# Supplementary material for: Glioblastoma epigenome profiling identifies SOX10 as a master regulator of molecular tumour subtype
Source: PubMed Central journal article supplement (PMC7749178; doi:10.1038/s41467-020-20225-w), 2020-12-18
Supplement: 41467_2020_20225_MOESM1_ESM.pdf [file 41467_2020_20225_MOESM1_ESM.pdf]

## Supplementary Information

### Glioblastoma epigenome profiling identifies SOX10 as a master regulator of molecular tumour subtype

Yonghe Wu<sup>1,2\*\*</sup>, Michael Fletcher<sup>1\*</sup>, Zuguang Gu<sup>2,3\*</sup>, Qi Wang<sup>3</sup>, Barbara Costa<sup>4</sup>, Anna Bertoni<sup>1</sup>, Ka-Hou Man<sup>1</sup>, Magdalena Schlotter<sup>1</sup>, Jörg Felsberg<sup>5,6</sup>, Jasmin Mangei<sup>1</sup>, Martje Barbus<sup>1</sup>, Ann-Christin Gaupel<sup>1</sup>, Wei Wang<sup>1</sup>, Tobias Weiss<sup>7</sup>, Roland Eils<sup>2,3</sup>, Michael Weller<sup>7</sup>, Haikun Liu<sup>8</sup>, Guido Reifenberger<sup>5,6</sup>, Andrey Korshunov<sup>9,10</sup>, Peter Angel<sup>4</sup>, Peter Lichter<sup>1,2,6</sup>, Carl Herrmann<sup>11</sup>§, Bernhard Radlwimmer<sup>12</sup>§

#### Affiliations

<sup>1</sup> Division of Molecular Genetics, German Cancer Research Center (DKFZ), Im Neuenheimer Feld 280, 69120 Heidelberg, Germany

<sup>2</sup> Heidelberg Center for Personalized Oncology (DKFZ-HIPO), Im Neuenheimer Feld 280, 69120 Heidelberg, Germany

<sup>3</sup> Division of Theoretical Bioinformatics, German Cancer Research Center (DKFZ), Im Neuenheimer Feld 280, 69120 Heidelberg, Germany

<sup>4</sup> Division of Signal Transduction and Growth Control, DKFZ/ZMBH Alliance, Im Neuenheimer Feld 280, 69120 Heidelberg, Germany.

<sup>5</sup> Institute of Neuropathology, Medical Faculty, Heinrich Heine University, Moorenstr. 5, 40225 Düsseldorf, Germany

<sup>6</sup> German Cancer Consortium (DKTK), partner site Essen/Düsseldorf, German Cancer Research Center (DKFZ), Im Neuenheimer Feld 280, 69120 Heidelberg, Germany

<sup>7</sup> Department of Neurology and Brain Tumor Center, University Hospital Zurich, Frauenklinikstrasse 26, CH-8091 Zurich, Switzerland

<sup>8</sup> Division of Molecular Neurogenetics, DKFZ-ZMBH Alliance, Im Neuenheimer Feld 280, 69120 Heidelberg, Germany.

<sup>9</sup> Department of Neuropathology, University of Heidelberg, Im Neuenheimer Feld 220, 69120 Heidelberg, Germany

<sup>10</sup> Clinical Cooperation Unit Neuropathology, German Cancer Research Center (DKFZ), Im Neuenheimer Feld 220-221, 69120 Heidelberg, Germany

<sup>11</sup> Health Data Science Unit, Medical Faculty Heidelberg, Im Neuenheimer Feld 267, 69120 Heidelberg, Germany. [carl.herrmann@bioquant.uni-heidelberg.de](mailto:carl.herrmann@bioquant.uni-heidelberg.de)

<sup>12</sup> Division of Molecular Genetics, German Cancer Research Center (DKFZ), Im Neuenheimer Feld 280, 69120 Heidelberg, Germany. [b.radlwimmer@dkfz.de](mailto:b.radlwimmer@dkfz.de)

\* These authors contributed equally.

§These authors jointly supervised this work.

**Supplementary Fig. 1.** Sample subtyping and genome-wide methylation dynamics in glioblastoma. **a** Glioblastoma samples ( $n = 60$ ) clustered using methylation array probes ( $n = 7386$ ) from Sturm et al., 2012. **b** Consensus subtyping based CpG Island (CGI) methylation and non-CGI methylation applied with hierarchical partitioning. Results are presented as follows: the inner circle corresponds to the methylation array subtyping as depicted in panel (a). The outer circle represents the cluster that the sample is assigned to in that data type, colored by the cluster identity. We found that CGI methylation cannot distinguish the MES and RTK I subtypes, while for non-CGI methylation the MES subtype splits into two subgroups, of which one is closer to the RTK II samples. These results illustrate that the methylation dynamics of GB subtypes vary depending on the features analysed. **c** Density heatmaps showing per-sample DNA methylation ( $y$ -axis, WGBS beta) genome-wide, in TSSs, exons, introns, and in intergenic regions. Heatmap colors correspond to density of the methylation distribution in each sample (column). Samples are labelled with their subtype. Below the heatmaps, multidimensional scaling (MDS) plots for sample methylation corresponding to (A) As observed in the methylation consensus subtyping in panel (b), the separation of subtypes is dependent on the methylation feature examined.

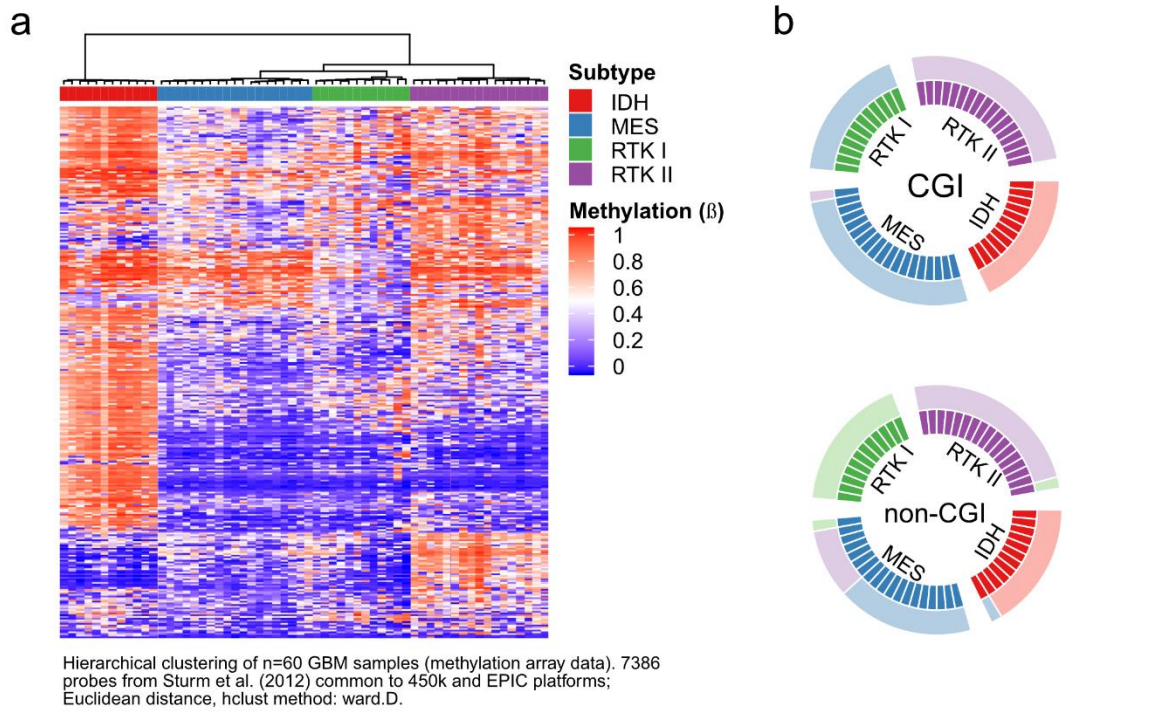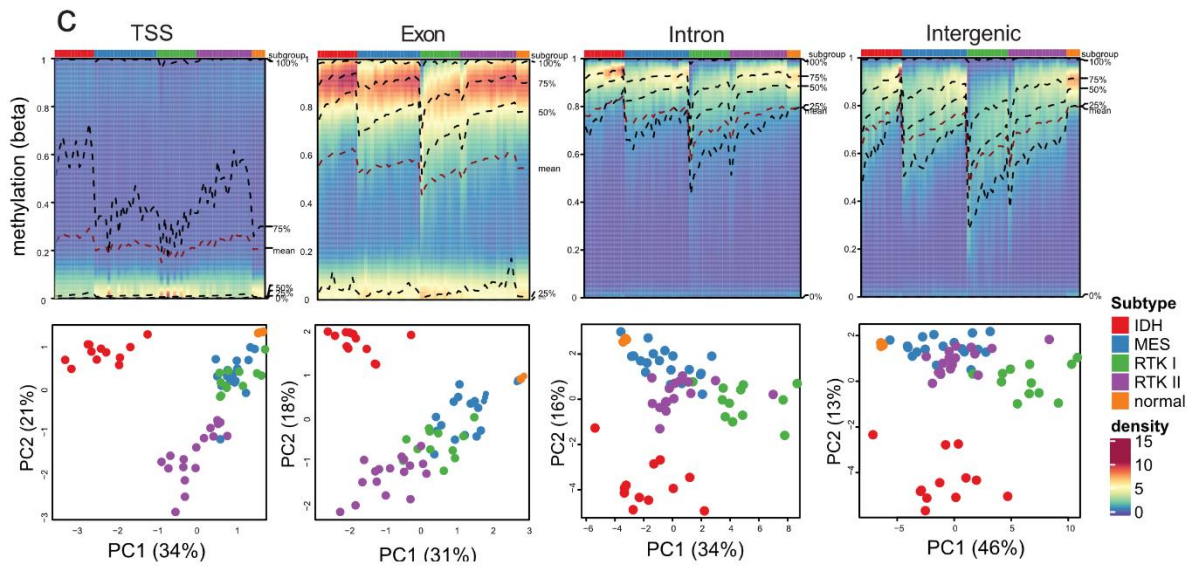

**Supplementary Fig. 2.** limma analysis of subtype gene signatures. **a** Venn diagram showing overlap of the limma-defined subtype gene signatures. For each subtype, gene expression was compared to the other 3 subtypes weighted equally (example: IDH vs (MES+RTK I+RTK II)/3). Genes with adj. *P*-value < 0.001 were deemed significant. **b** Multi-dimensional scaling (MDS) plot of all genes present in the 4 subtype gene signatures in all subtyped glioblastomas (*n* = 60) using limma-voom log-cpm values. Samples are coloured by their subtype. **c** Examples of subtype genes. From left: FREM3, IDH; CXCL5, MES; ERBB3, RTK I; MEOX2, RTK II. log-cpm values from limma-voom are plotted, grouped by subtype, as Tukey boxplots and violin plots. limma 2-sided *p*-values (corrected using the Benjamini-Hochberg method) are displayed. IDH, *n* = 12; MES, *n* = 19; RTK I, *n* = 12; RTK II, *n* = 17 samples. **d** Cahoy mouse brain cell signature ssGSEA enrichment and ESTIMATE scores for each subtype, shown as Tukey boxplots and violin plots. IDH, *n* = 12; MES, *n* = 19; RTK I, *n* = 12; RTK II, *n* = 17 samples. **e** Gene Ontology term annotation of subtype gene expression (significant terms at adj. *P*-value < 0.1 (two-sided) are shown; correction for multiple testing using the Benjamini-Hochberg method). Up-regulated genes for each subtype (logFC > 0, adj. *P*-value < 0.05) were tested for Gene Ontology enrichment. The number of tested genes for each subtype is indicated.

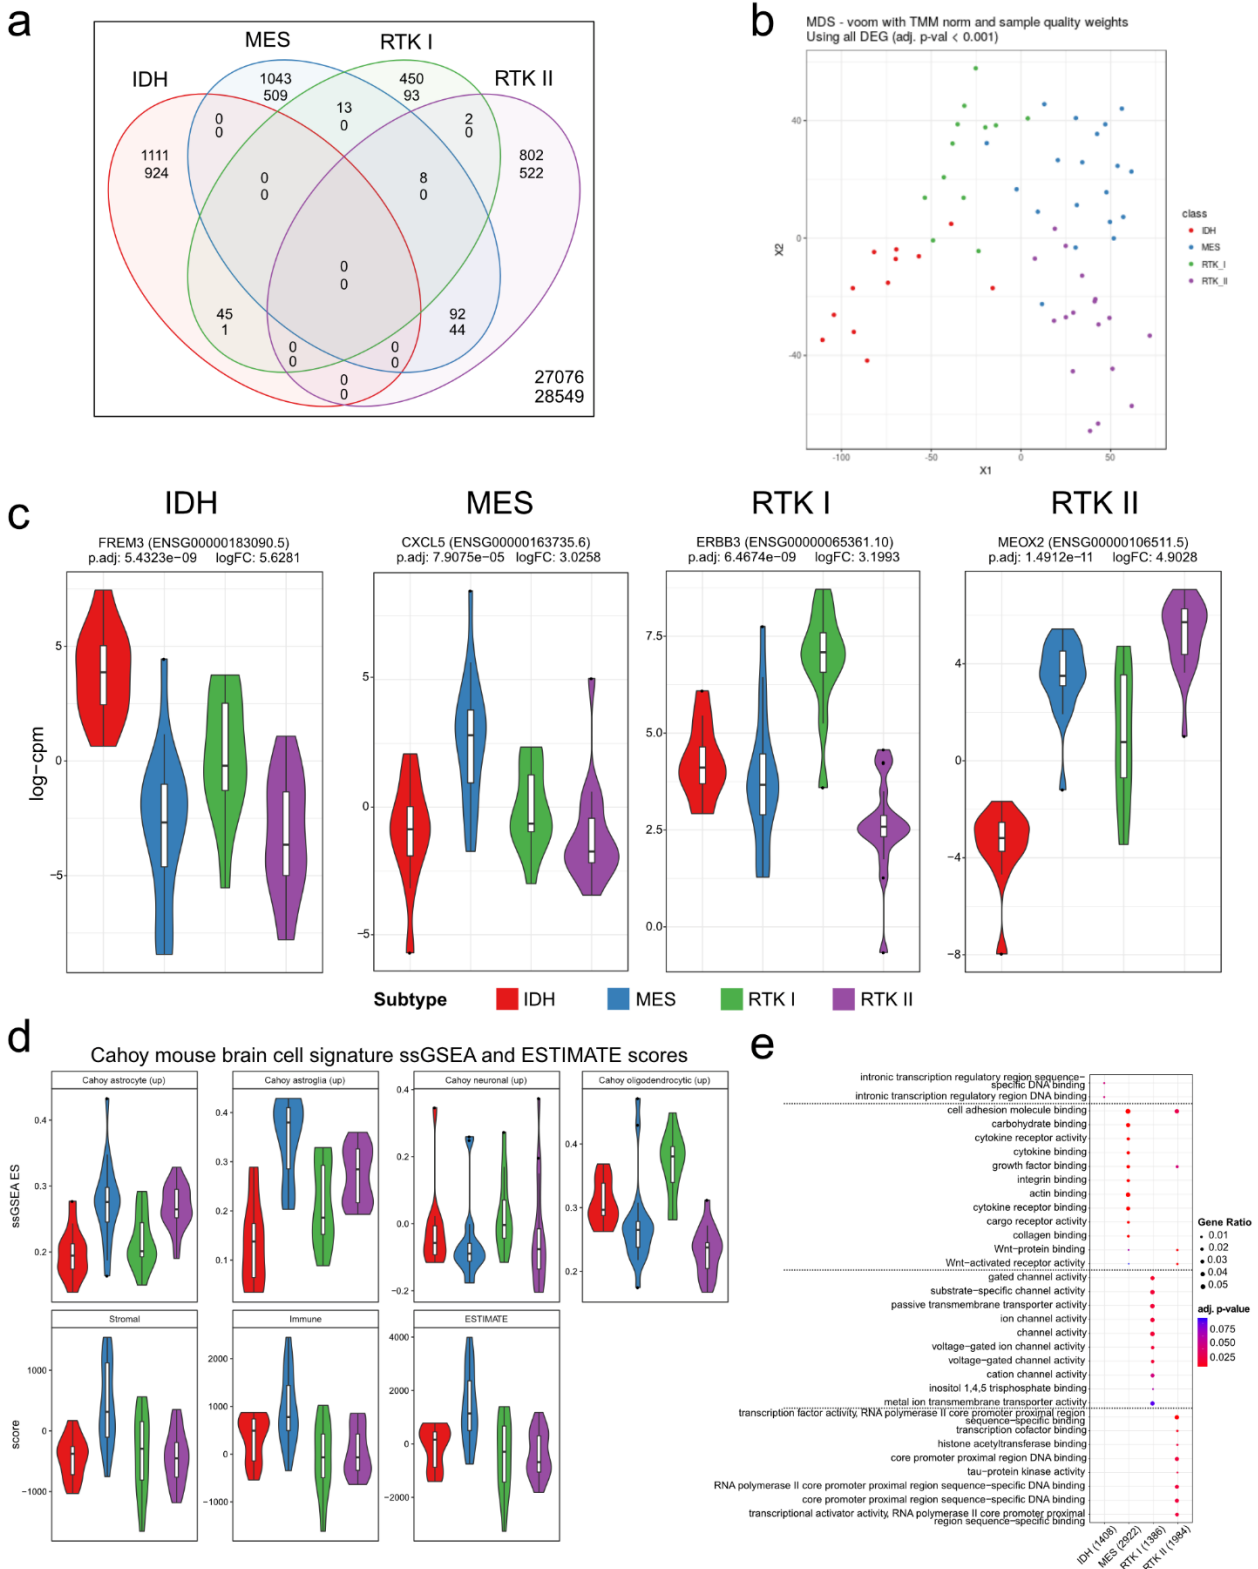

**Supplementary Fig. 3.** RTN analysis. **a** MDS plots showing the result of ComBat batch effect removal on the samples in cohort B. Each point corresponds to a sample, coloured by the source study. **b** Comparison of networks A and B using TF subtype activation scores. For TFs common to both networks ( $n = 506$ ), activity was defined as the 2-tail GSEA differential enrichment score (dES) for each TF regulon for each subtype signature. Common subtype MRs (adjusted  $P$ -value  $< 0.01$  with the same direction of activation in both networks) are coloured, and the Spearman's rank correlation is displayed. **c** Overlap of significant MRs identified in networks A and B. The overlap ( $n = 126$ ) is larger than the number of common subtype MRs ( $n = 117$ ) as the subtype is not taken into account. **d** Activity of common subtype MRs ( $n = 117$ ) across all subtypes. A heatmap of the TF activity (two-tailed dES-test, red activation; blue repression) is shown, with TFs (rows) clustered by the dES scores. Subtype significant MRs (adj.  $P$ -value  $< 0.01$ ; correction for multiple testing using the Benjamini-Hochberg method) are labelled with asterisks. We identify previously reported GB MRs (FOSL1/2, CEBP) and CNS developmental TFs (HES1, JUND, GLI2, POU3F2, SOX9, TCF3, NFIC, MAFB, BNC2, ASCL1, MYT1, MYT1L, SOX10). The two-tailed dES-test is similar to the GSEA permutation test ( $n=1000$  permutations) using the computed enrichment score.

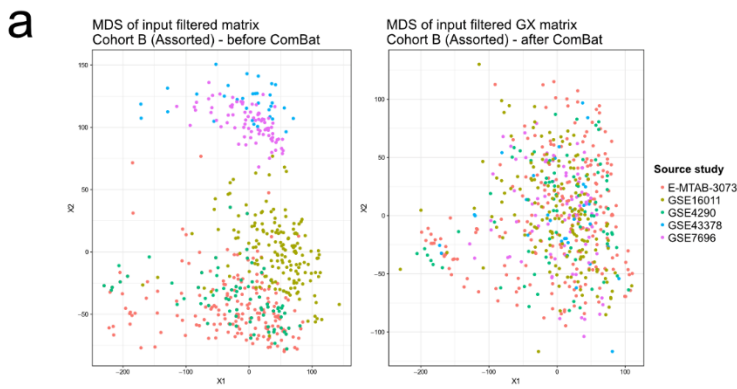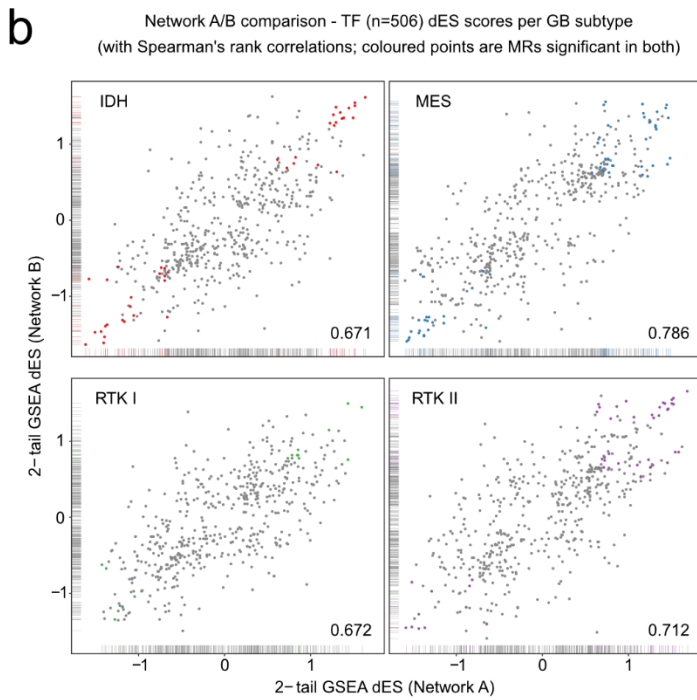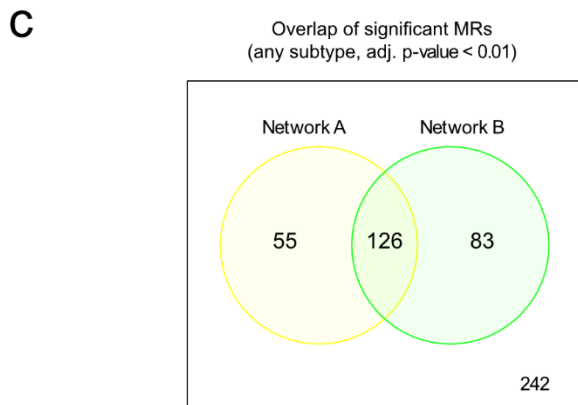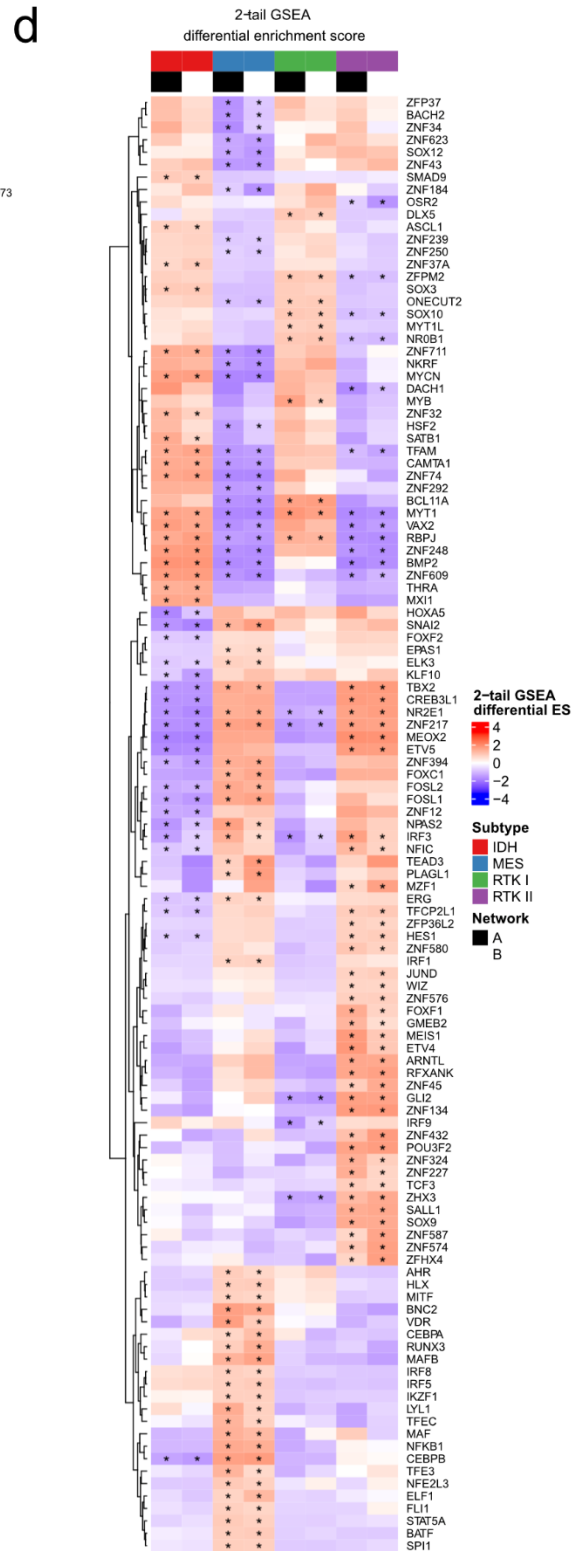

**Supplementary Fig. 4.** Cell line model selection. **a** SOX10 locus DNA methylation (beta) assayed by the 450k/EPIC DNA methylation arrays in GB cell lines (top) and the MES and RTK I subtype averages in this study's tumours (bottom). The distance from the assayed CpG to the SOX10 TSS is indicated above the heatmap. **b** SOX10 gene expression (Affymetrix microarray intensities) in GB cell line models. **c** Genome browser visualisation of the SOX10 locus. Histone modifications (H3K27ac, H3K4me1, H3K4me3) and the ChromHMM annotation from a single representative RTK I tumour and LN229 cells are shown, along with SOX10 binding (ChIP-seq), chromatin accessibility (ATAC-seq) and RNA-seq in LN229 and ZH487 cells. **d** Venn diagram of the overlap of SOX10 binding sites identified using ChIP-seq in the ZH487 (left) and LN229 (right) cell line models. The most significant result of *de novo* motif finding with HOMER, annotated as SOX10, for these common binding sites is displayed. Enrichment P-value for SOX10 was computed based on a binomial test comparing the frequency of the motif in foreground vs. background sequences.



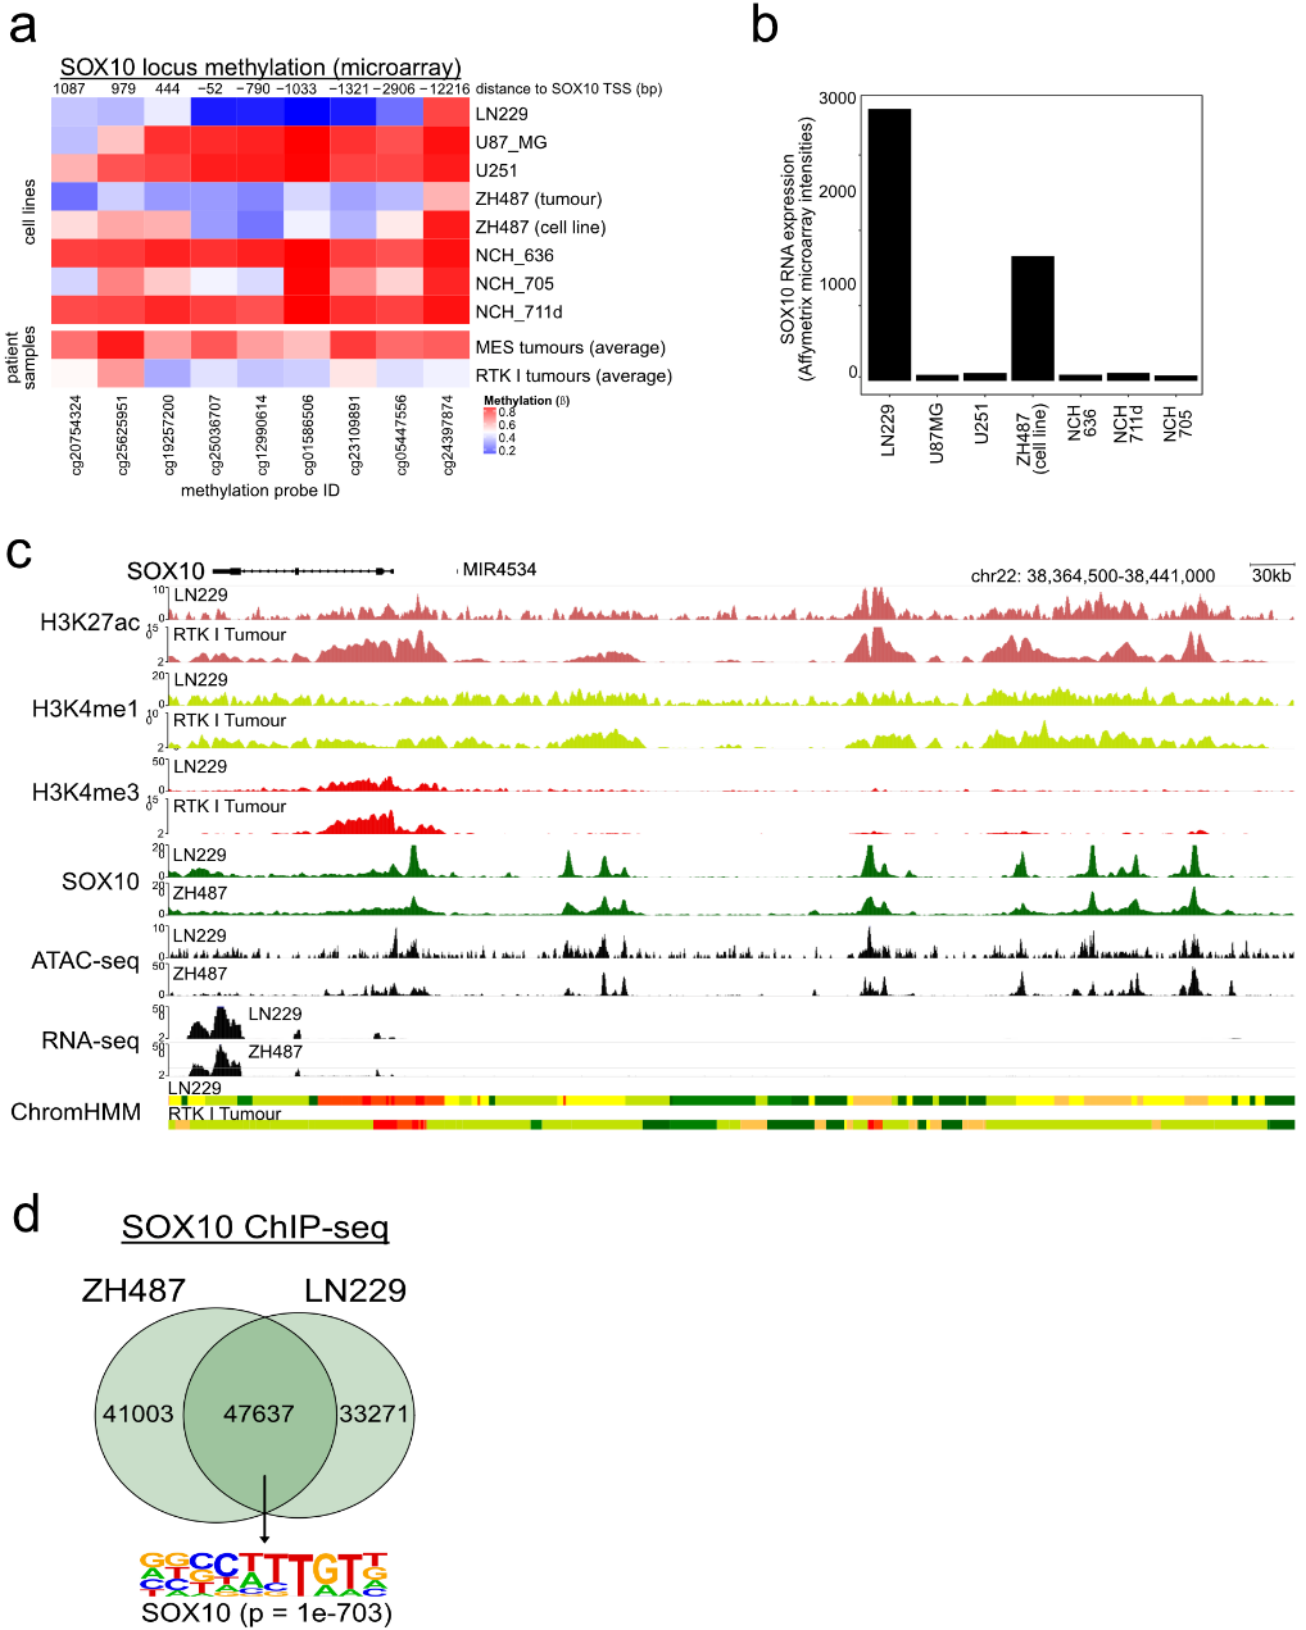

**Supplementary Fig. 5.** SOX10 repression causes a PN-MES transcriptomic switch. **a** Western blot showing efficient repression of SOX10 protein expression in ZH487, using shRNA (shSOX10), and LN229, using CRISPRi (sgSOX10); based on three independent experiments, each. Alpha-tubulin loading control is also displayed. Molecular weights (kDa) measured by standards are indicated on the left. **b** GSEA plots showing enrichment of a mesenchymal gene signature and concurrent depletion of a proneural gene signature in SOX10 KD relative to control ZH487 cells. GSEA-calculated statistics for gene set enrichment are shown. Top row: limma signatures; Bottom row: Wang signatures. *P*-values (control/RTK I: 0.018; control/PN\_: 0.074; KD/MES: < 0.001; KD/MES-Wang: < 0.001) and FDR values are computed empirically using a permutation test ( $n=1000$  permutations) based on the enrichment score. **c** Master Regulator activity heatmap (VIPER NES) for the RTK I and MES CRC MRs, in the LN229 and ZH487 cell line models. Average expression profiles for each condition (for LN229,  $n = 1$  replicate; for ZH487,  $n = 2$  replicates) were used in a VIPER analysis using RTN network A. Each column corresponds to a cell line condition, and is annotated with the cell line and treatment (top) and VIPER-inferred activity of SOX10 (bottom). \*: two-tailed *t*-test, *P*-value < 0.05. **d** Trans-well invasion assay of ZH487 cells without (top, control) and with SOX10 repression (bottom). Cell numbers were quantified for  $n = 10$  wells per condition in one experiment; scale bar: 50  $\mu\text{m}$ . **e** *Ex vivo* organotypic brain slice invasion assay. LN229 cells with and without SOX10 repression (shNT+Dox vs. shSOX10+Dox) were seeded into freshly harvested murine brain slices (350  $\mu\text{m}$ ) and left for 3 days. Representative, inverted colour images and bar plots of mean cell-spike length (pixels) of one experiment are shown; on average 15 spikes were examined per cell; control,  $n = 21$  cells; SOX10 KD,  $n = 15$  cells; ; scale bar: 100  $\mu\text{m}$ . Mean values are plotted in (d) and (e); whiskers indicate the standard deviation.

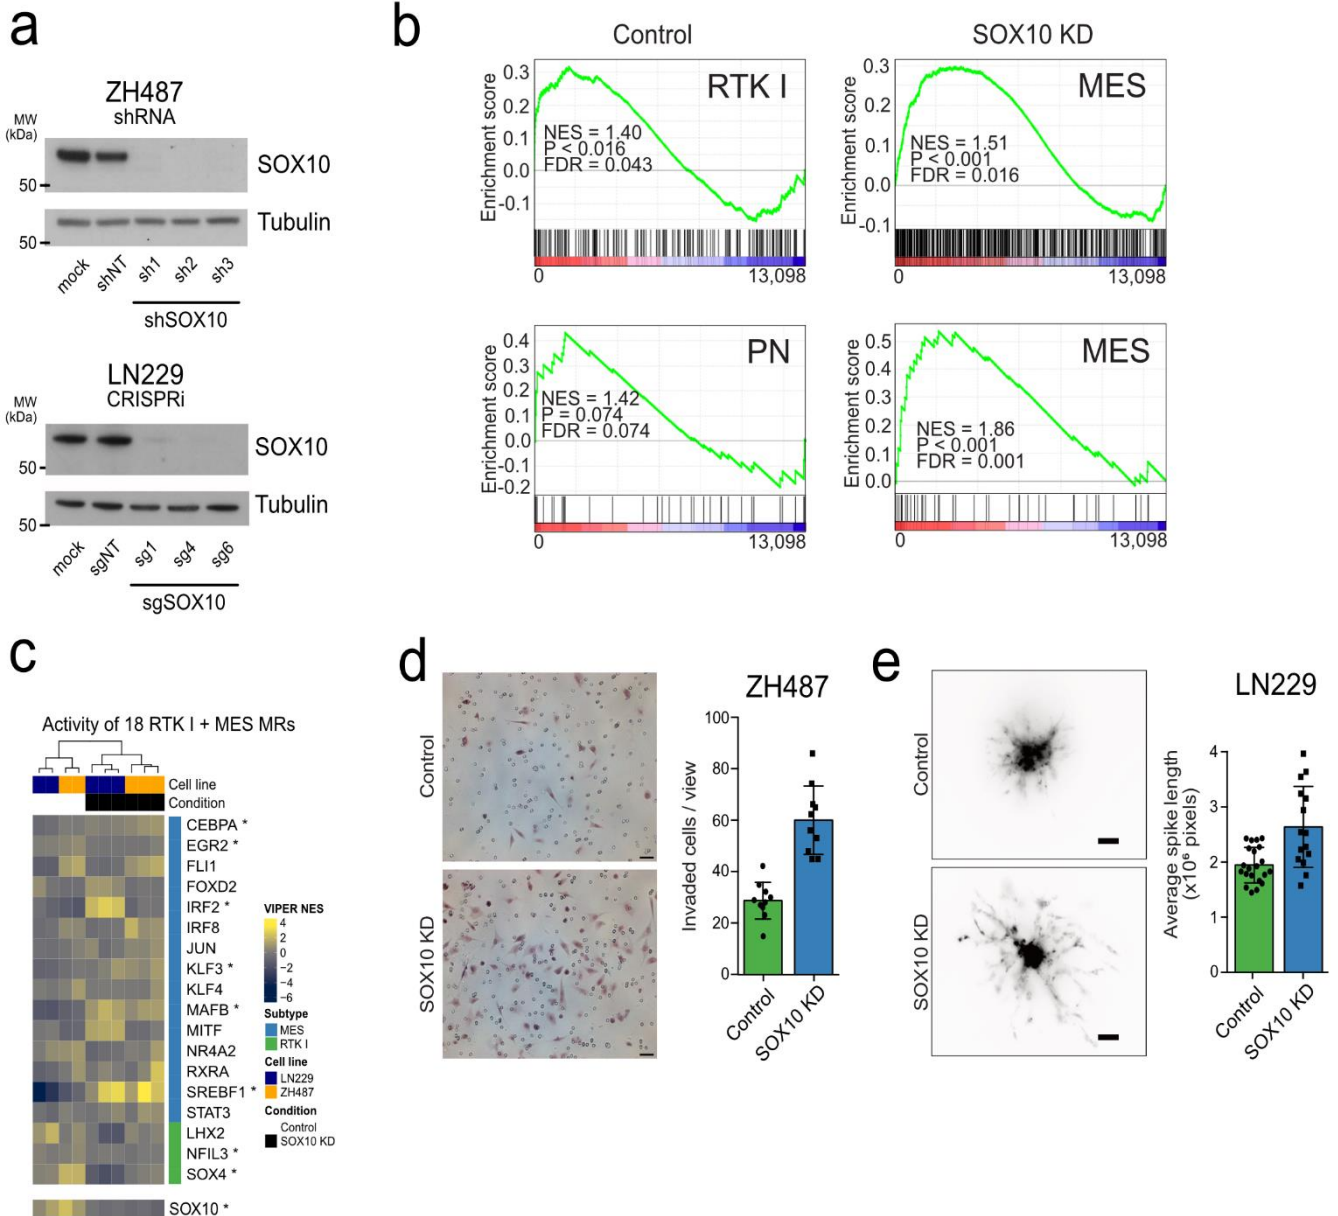

**Supplementary Fig. 6.** ZH487 genomics experiments. **a** EnrichedHeatmap visualisation of genome regions with differential chromosome accessibility in control and SOX10 KD ZH487 cells, as identified by ATAC-seq analysis. SES-normalised signals of SOX10 ChIP-seq, ATAC-seq, and BRD4 ChIP-seq are displayed. Signal intensity is shown in the blue-red heatmaps, where each row shows a single ATAC peak, as indicated by the vertical dashed lines, and 1kbp further 5' and 3'. The line plots at the top of each heatmap display the mean signal intensity across all the regions in that category (control: green; SOX 10 KD: blue). **b** Volcano plots of de novo motif finding with HOMER from the differentially bound ATAC-seq peaks in the ZH487 cells. The significantly enriched motifs are labelled. **c** Visualisation of ChIP-seq signal at SOX10 peaks in the ZH487 model. Per-factor scaled, SES-normalised signal is visualised for each SOX10 peak, extended for a further 1kbp on either side. **d** The epigenomic landscape of RUNX2 in the LN229 cell line in control (NT) and shSOX10 conditions. The tracks display (from top to bottom): RNA-seq; ATAC-seq; ChIP-seq signal for BRD4, H3K27ac and H3K4me1; and the ChromHMM annotation. Regions of interest are denoted with boxes (Prom, promoter; Enh. 1-3, candidate enhancer regions). **e** RUNX2 RNA expression levels in LN229 and ZH487 cells measured by RT-qPCR following JQ1 treatment (500nm, 6h) and SOX10 repression. **f** JQ1 treatment blocks BRD4 recruitment to RUNX2 enhancer regions in the LN229 model. The four open chromatin regions labelled in (H) (Prom, Enh. 1-3) were tested for BRD4 binding using ChIP-qPCR following SOX10 repression and JQ1 treatment (500nm, 6h). In (e) and (f) the mean values of 3 technical replicates of one experiment are shown.

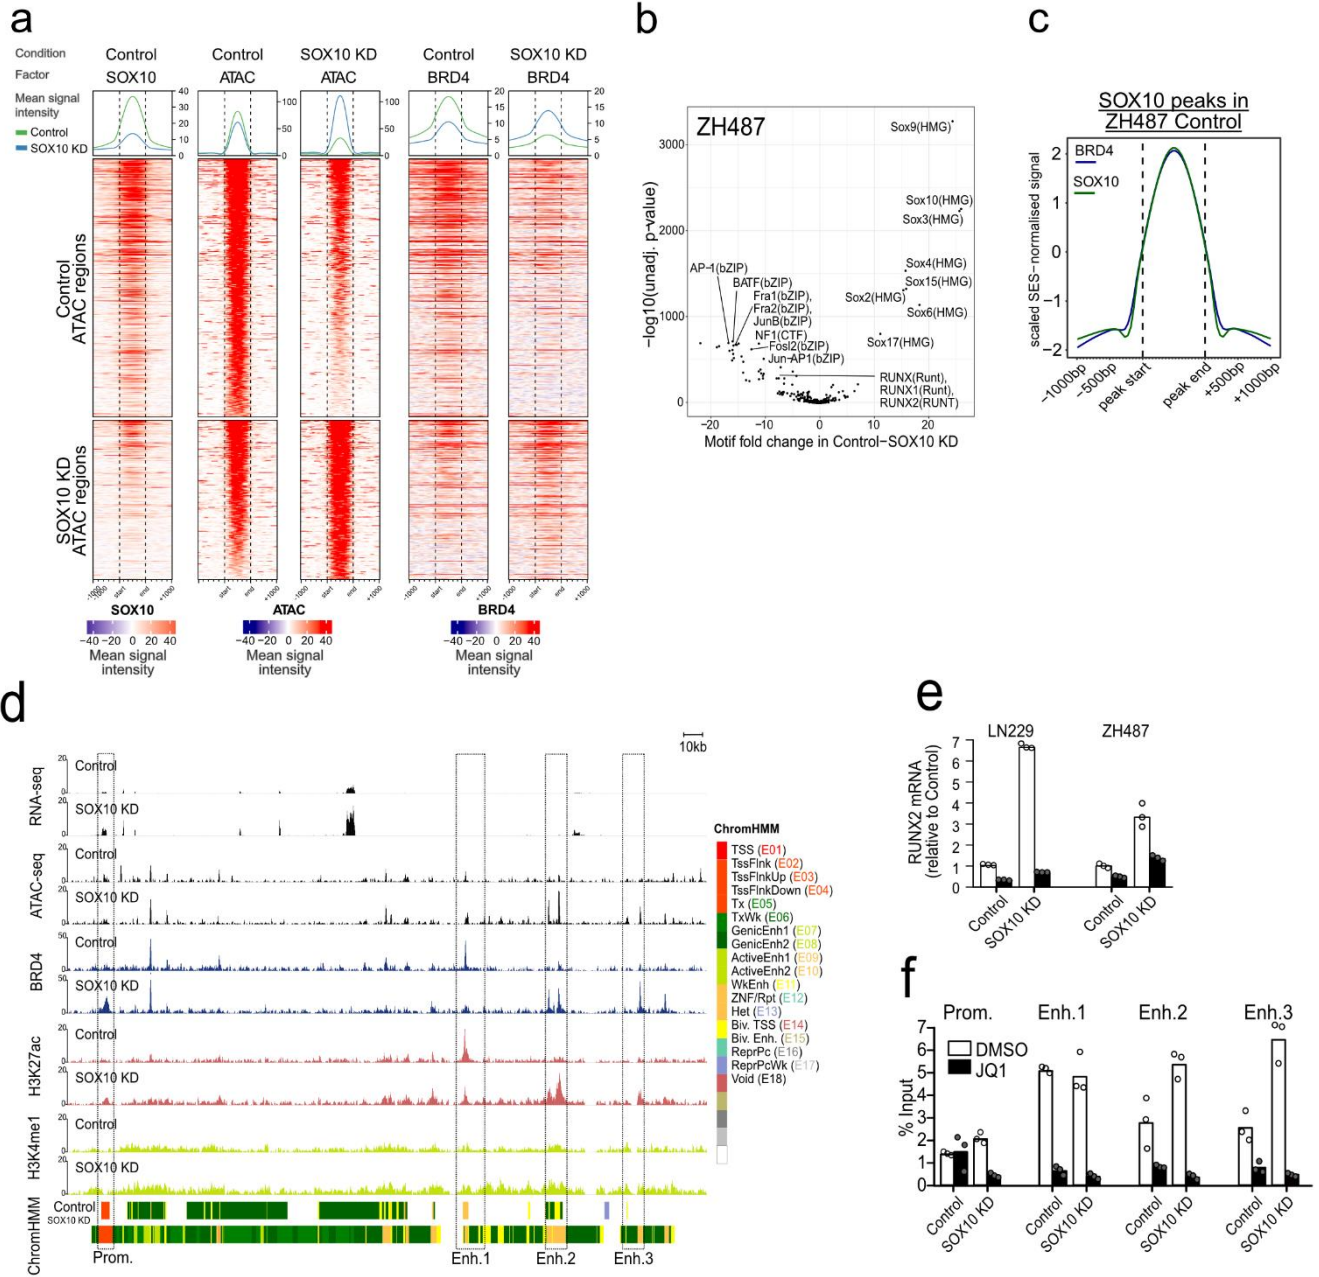

**Supplementary Fig. 7.** Uncropped Western blots. **a** BRD4/SOX10 co-IP in the cell line LN229 (Figure 5h). **b** SOX10 knockdown in the cell lines LN229 and ZH487 (Supplementary Fig. 5a).

**a**

Figure 5h

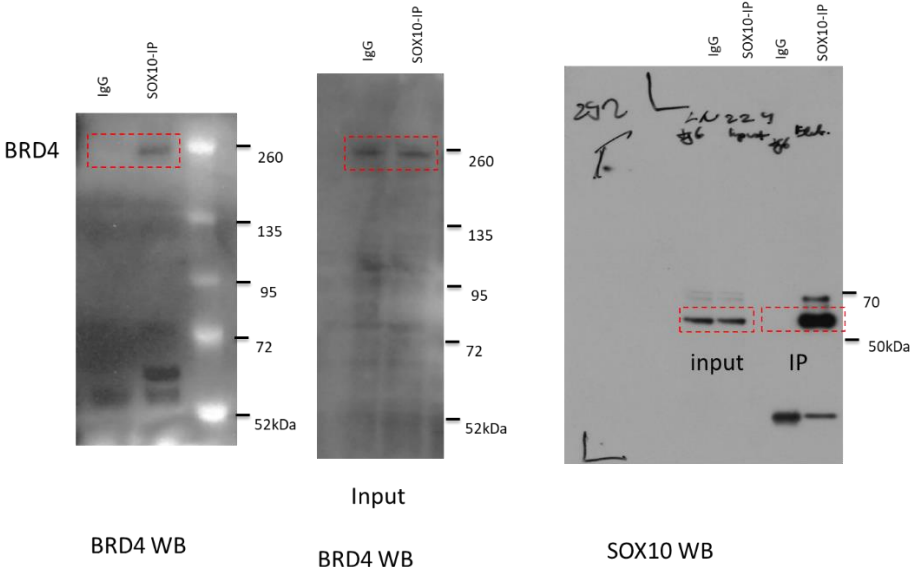

**b**

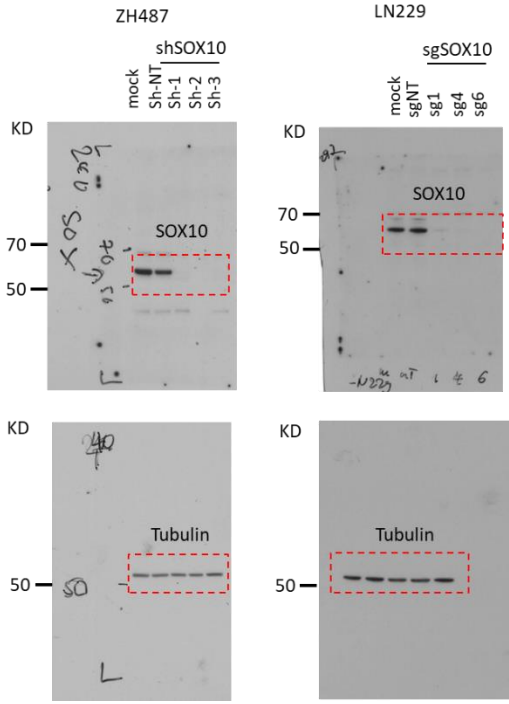

**Supplementary Table 1**

| REAGENT or RESOURCE                                        | SOURCE         | IDENTIFIER                       |
|------------------------------------------------------------|----------------|----------------------------------|
| <b>Antibodies</b>                                          |                |                                  |
| Goat anti-human SOX10 (Western blot)                       | Santa Cruz     | Cat#sc-17342                     |
| Rabbit anti-human SOX10 (ChIP-seq, Co-IP)                  | Abcam          | Cat#ab155279, lot GR113617-51    |
| Rabbit anti-Iba1 antibody (IHC)                            | Wako           | Cat#019-19741                    |
| Rabbit polyclonal BRD4 Ab (ChIP-seq, WB and ChIP-qPCR)     | Bethyl Lab.    | Cat#A301-985A100                 |
| H3K27Ac (GB patient ChIP-seq)                              | Active Motif   | Cat#AM#39133, lot 5              |
| H3K4me1(GB patient ChIP-seq)                               | Active Motif   | Cat#AM#38297, lot 1              |
| H3K4me3 (GB patient ChIP-seq)                              | Active Motif   | Cat#AM#39159, lot 2              |
| H3K9me3 (GB patient ChIP-seq)                              | Active Motif   | Cat#AM#39161, lot 3              |
| H3K27me3 (GB patient ChIP-seq)                             | Millipore      | Cat##07-449, lot 2382150         |
| H3K36me3 (GB patient ChIP-seq)                             | Active Motif   | Cat#AM#61101, lot 7              |
| Rabbit polyclonal to Histone H3 (cell line ChIP-seq)       | Abcam          | Cat#ab1791                       |
| Rabbit polyclonal to Histone H3K4me1 (cell line ChIP-seq)  | Abcam          | Cat#ab8895                       |
| Rabbit polyclonal to Histone H3K4me3 (cell line ChIP-seq)  | Abcam          | Cat#ab8580                       |
| Rabbit polyclonal to Histone H3K9me3 (cell line ChIP-seq)  | Abcam          | Cat#ab8898                       |
| Rabbit polyclonal to Histone H3K27ac (cell line ChIP-seq)  | Abcam          | Cat#ab4729                       |
| Rabbit polyclonal to Histone H3K36me3 (cell line ChIP-seq) | Abcam          | Cat#ab9050                       |
| Rabbit polyclonal to Histone H3K27me3 (cell line ChIP-seq) | Abcam          | Cat#ab6002                       |
| alpha-Tubulin                                              | Sigma          | Cat#T-9026                       |
| Green Fluorescence Protein (immunofluorescence)            | abcam          | Cat#13970                        |
| Allograft Inflammatory Factor 1 (IBA1; immunofluorescence) | Wako           | Cat#019-19741                    |
| <b>Bacterial and Virus Strains</b>                         |                |                                  |
| TOP10 Chemically Competent E. coli                         | Invitrogen     | Cat#C404010                      |
| Lentivirus (pLKO1, constitutive, packed in HEK293)         | Sigma Aldrich  | Cat# SHC001                      |
| Lentivirus (pLKO-Tet-On, packed in HEK293)                 | Addgene        | Cat#21915                        |
| Lentivirus (CRISPRi) pU6-sgRNA EF1Alpha-puro-T2A-BFP       | Addgene        | Cat#60955                        |
| <b>Biological Samples</b>                                  |                |                                  |
| Human glioblastoma tissue samples                          | Moscow, Russia | Burdenko Neurosurgical Institute |
| <b>Chemicals, Peptides, and Recombinant Proteins</b>       |                |                                  |
| DMEM medium                                                | Sigma          | Cat#D5546                        |
| L-glutamine                                                | Sigma          | Cat#G7513                        |
| Pen-strep                                                  | Sigma          | Cat#P4333                        |
| Fetal bovine serum                                         | Gibco          | Cat#10082147                     |
| Tet-Free FBS                                               | Clontech       | Cat#631106                       |
| Neurobasal medium                                          | Invitrogen     | Cat#10888-022                    |
| Human Recombinant EGF                                      | Gibco          | Cat#PHG0311                      |
| Human Recombinant FGF                                      | Biomol         | Cat#50361                        |
| B27 medium                                                 | Invitrogen     | Cat#12587010                     |
| QuantiTect Rev. Transcription Kit (50)                     | Qiagen         | Cat#205311                       |
| Puromycin                                                  | Gibco          | Cat#A1113803                     |

|                                                                              |                   |                   |
|------------------------------------------------------------------------------|-------------------|-------------------|
| RNase-Free DNase Set (50)                                                    | Qiagen            | Cat#79254         |
| QIAquick PCR Purification Kit (250)                                          | Qiagen            | Cat#28106         |
| QIAprep Spin Miniprep Kit (250)                                              | Qiagen            | Cat#27106         |
| QIAGEN Plasmid Maxi Kit (25)                                                 | Qiagen            | Cat#12163         |
| RNeasy Mini Kit (250)                                                        | Qiagen            | Cat#74106         |
| Bioanalyzer High Sensitivity DNA Analysis                                    | Agilent           | Cat#5067-4626     |
| Qubit™ dsDNA HS Assay Kit                                                    | Invitrogen        | Cat#Q32851        |
| Qubit™ RNA HS Assay Kit                                                      | Invitrogen        | Cat# Q32852       |
| DMEM/HAM F12                                                                 | Biochrom          | Cat#F4815         |
|                                                                              |                   |                   |
| Critical Commercial Assays                                                   |                   |                   |
| TruSeq Stranded Total RNA LT Sample Prep Kit                                 | Illumina          | Cat#RS-122-2201   |
| Paired-End Sample Prep Kit                                                   | Illumina          | Cat#PE-102-1002   |
| EZ DNA Methylation Kit                                                       | Zymo Research     | Cat#D5001         |
| Magna ChIP™ A/G Chromatin Immunoprecipitation Kit                            | Merck-Millipore   | Cat#17-10085      |
|                                                                              |                   |                   |
| Deposited Data                                                               |                   |                   |
| Raw data (restricted access)                                                 | EGA               | EGAS00001003230   |
| Processed and pseudo-anonymised data                                         | GEO               | GSE121723         |
|                                                                              |                   |                   |
| Experimental Models: Cell Lines                                              |                   |                   |
| Human: LN229                                                                 | ATCC              | Cat# CRL-2611     |
| Human: GB patient-derived ZH487                                              | Zurich University | N/A               |
| Human: HEK-293T                                                              | ATCC              | Cat#CRL-3216      |
| Mouse: mGB1                                                                  | DKFZ              | Peter Angel's lab |
|                                                                              |                   |                   |
| Oligonucleotides                                                             |                   |                   |
| qPCR Primers (see Supplementary Data 13)                                     | This paper        | N/A               |
| shRNA oligoes targeting human and mouse SOX10<br>(see Supplementary Data 13) | This paper        | N/A               |
| CRISPR-Cas9 SOX10 knockdown constructs<br>(see Supplementary Data 13)        | This paper        | N/A               |
| ChIP-qPCR primers sequence<br>(see Supplementary Data 13)                    | This paper        | N/A               |
|                                                                              |                   |                   |
| Recombinant DNA                                                              |                   |                   |
| pLKO.1-puro                                                                  | Sigma Aldrich     | Cat# SHC001       |
| psPAX2 (lentivirus packaging plasmid)                                        | Addgene           | Cat#12260         |
| pMD2.G (Lentivirus envelope plasmid)                                         | Addgene           | Cat#12259         |
|                                                                              |                   |                   |
| Software and Algorithms                                                      |                   |                   |
| R                                                                            | R-Project         | 3.4.3, 3.5.1      |
| STAR                                                                         | Open Source       | 2.3.0e            |
| htseq-count                                                                  | Open Source       | 0.6.0             |
| bwa-mem                                                                      | Open Source       | 0.7.8             |
| methylTools                                                                  | Open Source       | 1.0.0             |
| BEDTools                                                                     | Open Source       | 2.27.1            |
| MethylSeekR                                                                  |                   | 1.14.0            |
| Snakemake                                                                    | Open Source       | 3.13.3            |



|                                    |                 |                                                                                                     |
|------------------------------------|-----------------|-----------------------------------------------------------------------------------------------------|
| TrimGalore                         | Open Source     | <a href="https://github.com/FelixKrueger/TrimGalore">https://github.com/FelixKrueger/TrimGalore</a> |
| deepTools2                         | Open Source     | DeepTools (v. 2.3.1); Ref. 10                                                                       |
| MACS2                              | Open Source     | 2.1.1.2016030<br><a href="https://github.com/taoliu/MACS">https://github.com/taoliu/MACS</a>        |
| BowTie2                            | Open Source     | v. 2.3.4.39                                                                                         |
| SICER                              |                 | Ref. 22                                                                                             |
| ChromHMM                           | Open Souce      | 1.19                                                                                                |
| ROSE2                              | Open Source     | <a href="https://github.com/BradnerLab/pipeline/">https://github.com/BradnerLab/pipeline/</a>       |
| bigWigAverageOverBed               | Open Source     | v2                                                                                                  |
| CRCmapper                          | Open Source     | version 1.0 (December 2015)<br>Ref. 13                                                              |
| GSEA                               | Broad Institute | v3.0                                                                                                |
| HOMER                              | Open Source     | 4.9.1                                                                                               |
| minfi                              | Bioconductor    | 1.24.0                                                                                              |
| conumee                            | Bioconductor    | 1.30.0                                                                                              |
| edgeR                              | Bioconductor    | 3.20.1                                                                                              |
| limma                              | Bioconductor    | 3.34.4                                                                                              |
| GSVA                               | Bioconductor    | 1.26.0                                                                                              |
| ESTIMATE                           | Bioconductor    | 1.0.13                                                                                              |
| clusterProfiler                    | Bioconductor    | 3.6.0                                                                                               |
| cola                               | Bioconductor    | 1.0.0                                                                                               |
| gcrma                              | Bioconductor    | 2.50.0                                                                                              |
| sva                                | Bioconductor    | 3.26.0                                                                                              |
| RTN                                | Bioconductor    | 2.3.4                                                                                               |
| ggplot2                            | Bioconductor    | 2.2.1                                                                                               |
| monocle                            | Open Source     | 2.10.1                                                                                              |
| viper                              | Bioconductor    | 1.14.0                                                                                              |
| ComplexHeatmap                     | Bioconductor    | 1.18.1, 1.19.1                                                                                      |
| Rtsne                              | CRAN            | 0.13                                                                                                |
| ChIPpeakAnno                       | Bioconductor    | 3.12.4                                                                                              |
| EnrichedHeatmap                    | Bioconductor    | 1.9.2                                                                                               |
| TxDb.Hsapiens.UCSC.hg19.knownGene  | Bioconductor    | 3.2.2                                                                                               |
| DiffBind                           | Bioconductor    | 2.6.6                                                                                               |
| circlize                           | Bioconductor    | 0.4.6                                                                                               |
| Gviz                               | Bioconductor    | 1.22.3                                                                                              |
| epik                               | Open Source     | <a href="https://github.com/jokergoo/epik">https://github.com/jokergoo/epik</a>                     |
| featureCounts in the Subread suite | Open Source     | 1.5.3                                                                                               |

**Supplementary Table 2**

| <b>qPCR primers</b>     |         |                          |
|-------------------------|---------|--------------------------|
| name                    | species | primer sequence          |
| SOX10-F                 | human   | CTTTCTTGTGCTGCATACGG     |
| SOX10-R                 | human   | AGCTCAGCAAGACGCTGG       |
| ERBB3-F                 | human   | CAAGTTCCTTGAGGAGCTG      |
| ERBB3-R                 | human   | CATCTCGTTGCCGATTCATA     |
| Olig2-F                 | human   | GCTCCTCAAATCGCATCCA      |
| Olig2-R                 | human   | AAAGGTCATCGGGCTCTG       |
| CSPG4-F                 | human   | TGGCCTTCACTGTCACTGTCC    |
| CSPG4-R                 | human   | CACTTGCTTCTGGGCCGTCACTCG |
| CD44-F                  | human   | GACACCATGGACAAGTTTTGG    |
| CD44R                   | human   | AAGCGGCAGGTCATATTCAA     |
| RUNX2-F                 | human   | TGGTTACTGTCATGGCGGGTA    |
| RUNX2-R                 | human   | TCTCAGATCGTTGAACCTTGCTA  |
| FOSL2-F                 | human   | CAGAAATTCCGGGTAGATATGCC  |
| FOSL2-R                 | human   | GGTATGGGTTGGACATGGAGG    |
| SERPINE1-F              | human   | ACCGCAACGTGGTTTTCTCA     |
| SERPINE1-R              | human   | TTGAATCCCATAGCTGCTTGAAT  |
| ARF-F                   | human   | GACCACGATCCTCTACAAGC     |
| ARF-R                   | human   | TCCCACACAGTGAAGCTGATG    |
| DCTN2-F                 | human   | CGCCATGGCGACCCTAAAT      |
| DCTN2-R                 | human   | TTGTCAGCTCCTCCGCATCGAA   |
| Sox10-F                 | mouse   | GTGCCAGCAAGAGCAAGCCG     |
| Sox10-R                 | mouse   | CTGCCTTCCCGTTCTTCCGCC    |
| Hprt-F                  | mouse   | CTTCCTCCTCAGACCGCTTTTT   |
| Hprt-R                  | mouse   | ATGTAATCCAGCAGGTCAGCAA   |
| Gapdh-F                 | mouse   | GTGCAGTGCCAGCCTCGTCC     |
| Gapdh-R                 | mouse   | CAGGCGCCCAATACGGCCAA     |
| <b>ChIP-PCR primers</b> |         |                          |
| RUNX2-Prom-F            | human   | CCATCACCTCCATCCTCTTTC    |
| RUNX2-Prom-R            | human   | AATACGCATCACAACAGCC      |
| RUNX2-enh1-F            | human   | TTTTTCTGCTGCGAACAATG     |
| RUNX2-enh1-R            | human   | CCCCAAAGACTTCCAAAACAC    |
| RUNX2-enh2-F            | human   | CTTCCATTCTCTTCTCTTCC     |
| RUNX2-enh2-R            | human   | CGAAAATAGCTCAGCTCTGAC    |
| RUNX2-enh3-F            | human   | CCAAAAGAACGACCACAAAAC    |
| RUNX2-enh3-R            | human   | CCAAAACCCTCTCCAGAAC      |

Supplementary Table 3

| SOX10 shRNA constructs                 |         | species                                                           | sequence  | strand            | order number  | target region | type        | vector |
|----------------------------------------|---------|-------------------------------------------------------------------|-----------|-------------------|---------------|---------------|-------------|--------|
| name                                   |         |                                                                   |           |                   |               |               |             |        |
| non-targeting (NT)                     | human   | CCGGCAAC AAGATGAAGAGCACC AACTCGAGTTGGTGTCTTCATCTTGTGTTTT          | sense     | SHC002 from Sigma | non-targeting | constitutive  | pLKO.1      |        |
| Gilbert et al., Cell 2014; 159:647-661 | human   | AATTA AAAACAAC AAGATGAAGAGCACC AACTCGAGTTGGTGTCTTCATCTTGTGTTTT    | antisense |                   |               |               |             |        |
| human shSOX10-1                        | human   | CCGGCCTCATCTTTGCTGAGAACTCGAGTTCTAGACAAGAATGAGGTTTTTG              | sense     | TRCN0000018984    | 3' UTR        | constitutive  | pLKO.1      |        |
|                                        | human   | AAITCAAAAACCTCATCTTTGCTGAGAACTCGAGTTCTAGACAAGAATGAGG              | antisense |                   |               |               |             |        |
| human shSOX10-2                        | human   | CCGGCTGCTGAACGAAAGTGACAACTCGAGTTGTCACTTTCAGTTCAGCAGCTTTTGG        | sense     | TRCN0000018988    | CDS           | constitutive  | pLKO.1      |        |
|                                        | human   | AAITCAAAAAGCTGCTGAACGAAAGTGACAACTCGAGTTGTCACTTTCAGTTCAGCAGC       | antisense |                   |               |               |             |        |
| human shSOX10-3                        | human   | CCGGCAGCCAGTATATACGACACTCTCGAGAGTGTGTATATACTGGCTGTTTTTG           | sense     | TRCN0000018987    | CDS           | constitutive  | pLKO.1      |        |
|                                        | human   | AAITCAAAAAGCAGCCAGTATATACGACACTCTCGAGAGTGTGTATATACTGGCTGTC        | antisense |                   |               |               |             |        |
| pLKO-Tet-On-nontarget shRNA            | human   | CCGGCAAC AAGATGAAGAGCACC AACTCGAGTTGGTGTCTTCATCTTGTGTTTT          | sense     | SHC002 from Sigma | non-targeting | inducible     | pLKO-Tet-On |        |
|                                        | human   | AATTA AAAACAAC AAGATGAAGAGCACC AACTCGAGTTGGTGTCTTCATCTTGTGTTTT    | antisense |                   |               |               |             |        |
| human pLKO-Tet-On-shSOX10-2            | human   | CCGGCCGGGCTGCTGAACGAAAGTGACA AACTCGAGTTGTCACTTTCAGCAGCCCGTTTTT    | sense     | TRCN0000018988    | CDS           | inducible     | pLKO-Tet-On |        |
|                                        | human   | AAITTA AAAACCGGGCTGCTGAACGAAAGTGACA AACTCGAGTTGTCACTTTCAGCAGCCCGG | antisense |                   |               |               |             |        |
| mouse shSox10                          | mouse   | CCGGTTGCTCCAGCGTACCCTTAATCTCGAGATTAGGTATCGCTGGAGCAATTTTTG         | sense     | TRCN0000244290    | 3' UTR        | constitutive  | pLKO.1      |        |
|                                        | mouse   | AAITCAAAAATTTGCTCCAGCGATACCTTAATCTCGAGATTAGGTATCGCTGGAGCAA        | antisense |                   |               |               |             |        |
| CRISPR-Cas9 SOX10 kd constructs        | species | sequence                                                          | strand    |                   | target region | type          | vector      |        |
| NT_1 (non-targeting-1)                 | human   | TTGGCGCCAAACGTGCCCTGACGGGTTTTAAGAGC                               | sense     |                   | non-targeting | constitutive  | pLKO.2      |        |
| Gilbert et al., Cell 2014; 159:647-661 | human   | TTAGCTCTTAACCCGTCAGGGCAGGTTGGCGCCAAACAAG                          | antisense |                   |               |               |             |        |
| NT_2 (non-targeting-2)                 | human   | TTGGTGCATGGGGGGTGGTAGCGTTAAGAGC                                   | sense     |                   | non-targeting | constitutive  | pLKO.2      |        |
| Gilbert et al., Cell 2014; 159:647-661 | human   | TTAGCTCTTAACCCGTCAGGGCAGGTTGGCGCCAAACAAG                          | antisense |                   |               |               |             |        |
| Sg1 (SOX10_Guide1)                     | human   | TTGATTCAGGCTCCGCTCAACGGTTAAGAGC                                   | sense     |                   | CDS           | constitutive  | pLKO.2      |        |
|                                        | human   | TTAGCTCTTAACCGTTAGGACGGAGCTGAATCAACAAG                            | antisense |                   |               |               |             |        |
| Sg4 (SOX10_Guide4)                     | human   | TTGGAGCTGGACCGCACACCTTGTTAAGAGC                                   | sense     |                   | CDS           | constitutive  | pLKO.2      |        |
|                                        | human   | TTAGCTCTTAACAAAGGTGTGGGTCCAGCTCGCAACAAG                           | antisense |                   |               |               |             |        |
| Sg6 (SOX10_Guide6)                     | human   | TTGAGTCTCGGGCTGTCGGCCAGTTTAAGAGC                                  | sense     |                   | 5' UTR        | constitutive  | pLKO.2      |        |
|                                        | human   | TTAGCTCTTAACATGGCCGGACAGCCCGAGACTCAACAAG                          | antisense |                   |               |               |             |        |

## Supplementary Methods

**General settings for sample-wise methylation features:** methylation was represented as vectors of beta values, in which the order of data points corresponds to chromosomal CpG positions. Methylation features (partially methylated domains (PMDs), lowly methylated regions (LMRs), DNA methylation valleys (DMVs)) are defined based on the comparison of methylation measurements between genome segments. Each segment should be homogeneous in its methylation, relative to outside regions. We used the Bayesian framework and dynamic programming approach of fastseg (1.20.0) <sup>1</sup> to identify change points in the genome corresponding to segment borders.

As fastseg does not take consideration the distance between CpG sites, each chromosome was split into blocks if the gap between two adjacent CpG sites is larger than 100kb. Blocks containing less than 50 CpG sites were removed.

While fastseg can predict segment borders, each segment must still be classified based on its methylation. To do so, we examined the distribution of the mean and standard deviation of methylation in segments. The following plots visualize the distribution of segments' methylation means and standard deviations for all tumour samples and all normal samples, separated by subtype:

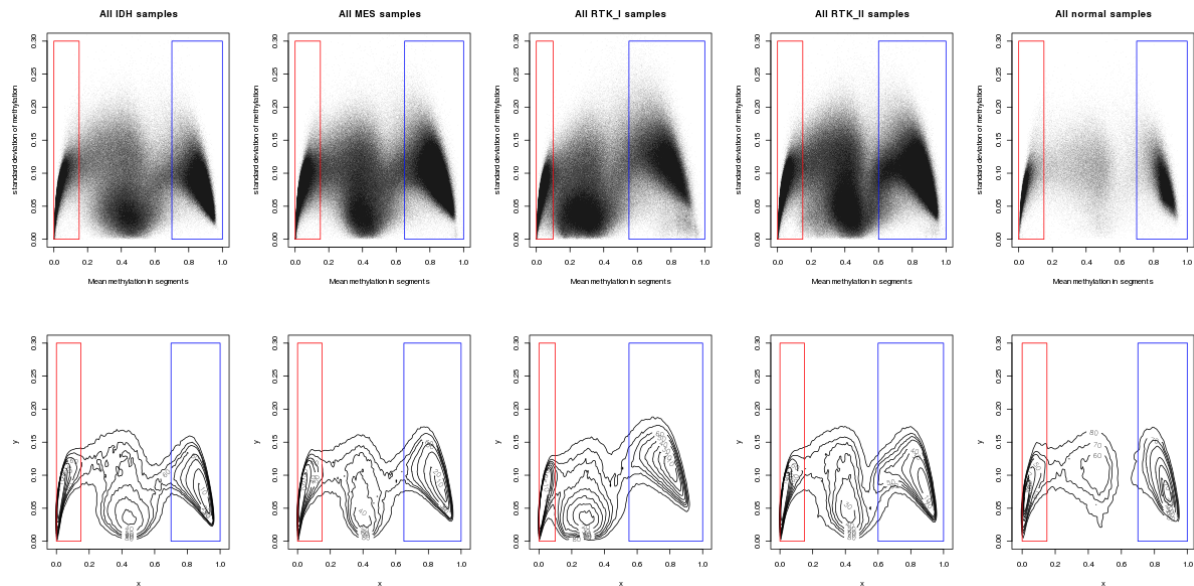

**Supplementary Fig. 8.** Methylation segment classification. Mean methylation (beta values; X-axis) are plotted against the standard deviation of methylation (Y-axis). Red and blue boxes indicate the low and high methylation segments for each glioblastoma subtype and normal brain samples. IDH,  $n = 12$ ; MES,  $n = 19$ ; RTK I,  $n = 12$ ; RTK II,  $n = 17$  samples.

It is clear that there are at least two major clusters of data points: one corresponding to low methylation and the other corresponding to high methylation. The remaining points form a sparse and heterogeneous intermediate group. According to the distribution of the points, we categorized segments into three groups using the following cutoffs:

- Group 1 segments, low methylation: IDH: mean  $< 0.15$ ; MES: mean  $< 0.15$ ; RTK I: mean  $< 0.10$ ; RTK II: mean  $< 0.15$ . (marked by red rectangles)
- Group 3 segments, high methylation: IDH: mean  $> 0.7$ ; MES: mean  $> 0.65$ ; RTK I: mean  $> 0.55$ ; RTK II: mean  $> 0.60$ . (marked by blue rectangles)
- Group 2 segments, intermediate methylation: all remaining segments.

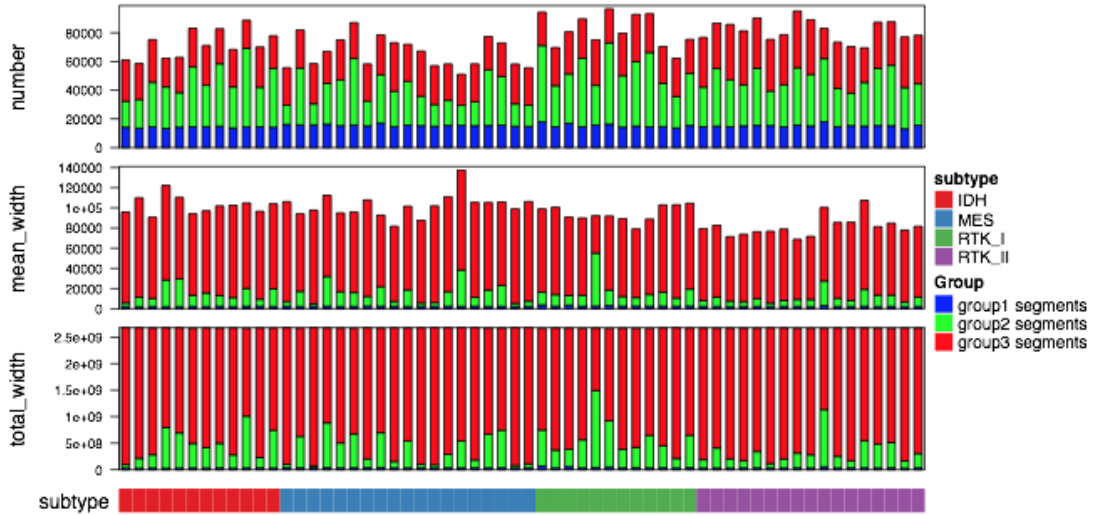

**Supplementary Fig. 9.** Methylation segment features. Comparison of the three methylation segment types based on their number and length in all subtypes. IDH,  $n = 12$ ; MES,  $n = 19$ ; RTK I,  $n = 12$ ; RTK II,  $n = 17$  samples.

The above summary plot shows the number of segments, mean segment width and the total number of base pairs of segments in all tumour samples. We observe overall that there are more group 2 segments by absolute number, but group 3 segments are much longer on average and represent the majority of the genome. For some samples which show global hypomethylation (RTK I subgroup), the group 2 segments are longer and represent most of the genome. Group 1 segments are short and occupy much smaller proportions of the genome. Next we define different methylation features based on the three sets of segments.

**DNA methylation valleys.** DNA methylation valleys (DMVs) are regions showing very low methylation. One major feature identifying DMVs is that they are highly hypomethylated compared to the flanking regions. As such, we looked for DMVs in group 1 segments. For each segment, we denote the mean methylation as  $m$ , we calculated the absolute methylation difference to its two neighbouring segments:

$$m_{diff} = \min(|m - m_{left}|, |m - m_{right}|)$$

and to meet the assumption that methylation drops within DMVs, we defined an additional criterion:

$$m < m_{left} \text{ and } m < m_{right}$$

To determine the cutoff of  $m_{diff}$ , we plotted  $m_{diff}$  vs segment width for all tumour samples and all normal samples. The distributions in the following plots are quite homogeneous. For DMVs, we simply set  $m_{diff} > 0.5$  for IDH/MES/RTK II/normal while  $m_{diff} > 0.3$  for RTK I (vertical dashed lines).

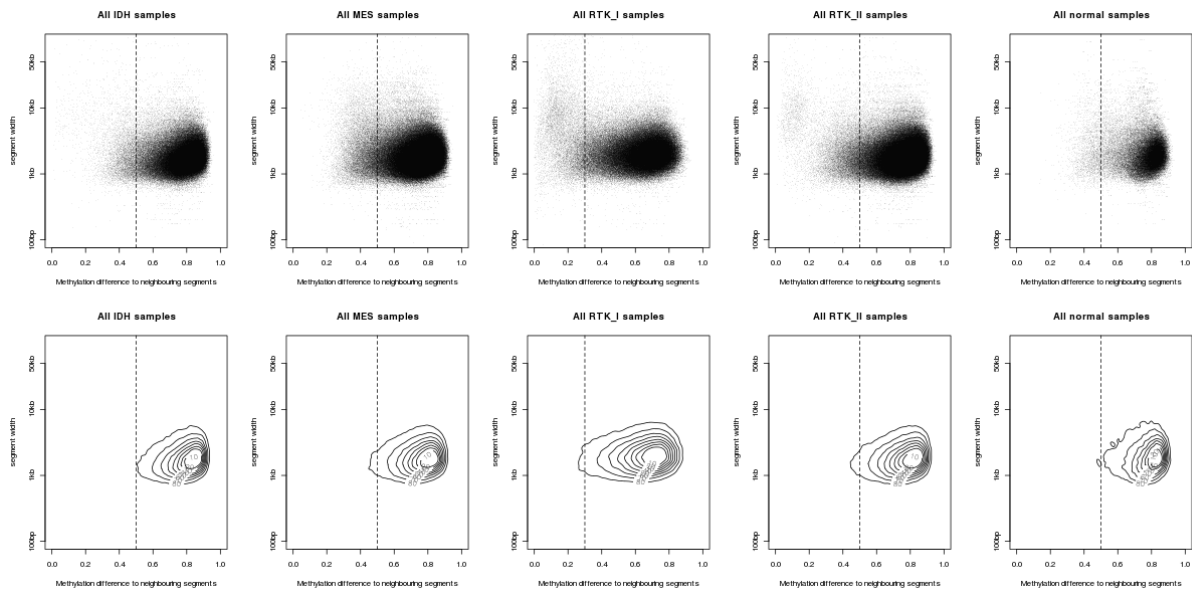

**Supplementary Fig. 10.** Identification of DNA methylation valleys. Methylation difference to neighbouring segments (beta values; X-axis) are plotted against the segment widths (Y-axis). The five plots in the first row were made as scatter plots and the plots in the second row were made as contour plots for visualizing the 2D density distributions of data points. Vertical dash lines corresponded to the cutoffs for selecting DMVs. IDH,  $n = 12$ ; MES,  $n = 19$ ; RTK I,  $n = 12$ ; RTK II,  $n = 17$  samples.

**Lowly methylated regions:** Similar to DMVs, lowly methylated regions (LMRs) also show lower methylation compared to neighbouring segments; however, the absolute methylation level is not as low as in DMVs. We searched for LMRs in group 2 segments. As with DMVs, we plot the absolute methylation difference versus the width of group 2 segments. In contrast to the same plots for DMVs, we observed two major clusters in these plots. One cluster corresponds to relatively higher methylation with shorter widths, and the other to relatively lower methylation with longer widths. As LMRs are normally short regions, we defined segments as LMRs if the methylation difference is larger than 0.26 and the width is less than 5kb (green rectangles on plot).

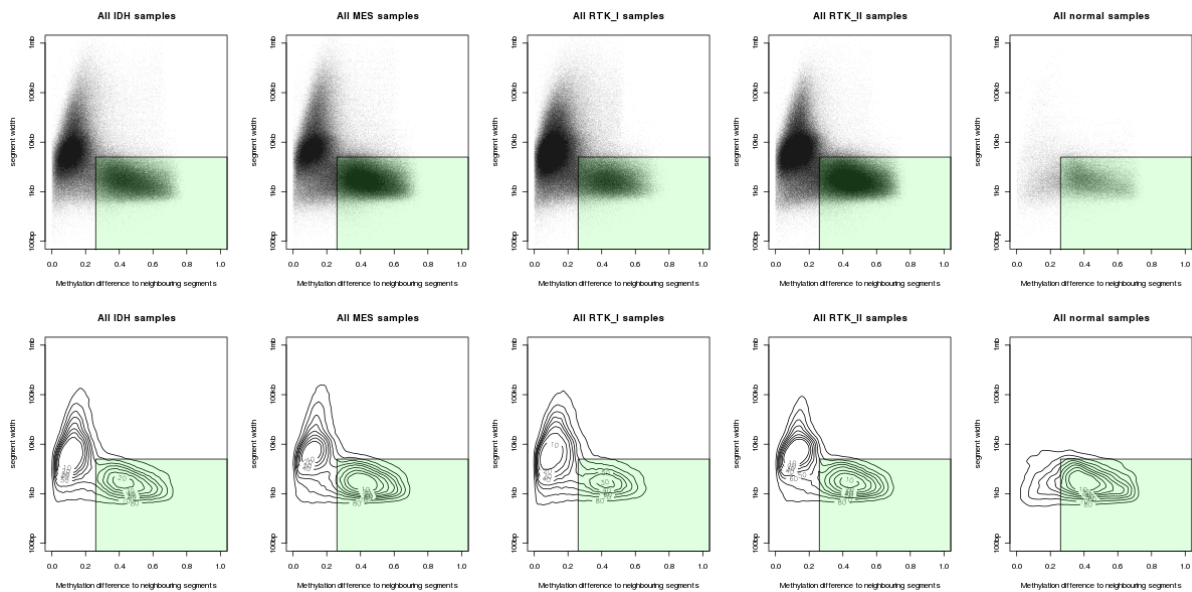

**Supplementary Fig. 11.** Identification of lowly methylated region. Methylation difference to neighbouring segments (beta values; X-axis) are plotted against the segment widths (Y-axis). The five plots in the first row were made as scatter plots and the plots in the second row were made as contour plots for visualizing the 2D density distributions of data points. Green rectangles covered the segments that were selected as LMRs. IDH,  $n = 12$ ; MES,  $n = 19$ ; RTK I,  $n = 12$ ; RTK II,  $n = 17$  samples.

**Partially methylated domains.** MethylSeekR (1.14.0) <sup>2</sup> was used to detect PMDs. The PMD segments are filtered by width > 10kb.

**Consensus regions:** As DMV/LMR/PMD are called for each sample separately, we defined the subtype-wide consensus feature set as follows. For  $k$  sets of e.g. LMRs, segments with a cross-sample coverage larger than or equal to 4 are kept as subtype-level consensus LMRs. Finally neighbouring LMRs are merged if the distance between them is less than 1kb, to minimise the number of small segments.

**Enrichment of genomic features:** we adopted the following method to calculate the enrichment of a set of methylation features (e.g. LMRs) in another set of genomic features (e.g. genes or certain chromatin states). We calculated the overlap of the two sets of regions of interest using the Jaccard coefficient, defined as the total number of basepairs in the intersection of the two sets divided by the total number of basepairs in the two sets' union. The significance of this overlap is calculated by comparison to a background set of genomic regions with a comparable CpG content. Background regions were selected as follows steps: 1) Select a proper window for the methylation feature sets. Regions in methylation feature sets are split into windows with size  $w$ , defined as the 25<sup>th</sup> quantile of all widths in that set, rounded to the thousandth digit. If  $w$  is smaller than 1kb or larger than 10kb, it is set to that value. Small windows with width less than  $w/4$  are filtered out. 2) Calculate the CpG content for those windows. For this filtered window list, the number of CpG sites per 1kb is calculated and denoted as a vector  $p$ . 3) Select genomic background with similar CpG content. The number of CpG sites per 1kb is also calculated for all 1kb windows in the genome, denoted as  $p_g$ , and appropriate CpG-matched background genomic regions are selected by picking windows with  $p_g$  between the 5<sup>th</sup> and 95<sup>th</sup> percentiles of  $p$  from the methylation feature window list. The background distribution of overlaps is calculated by randomly permuting the input methylation regions with these CpG-matched background regions 1000 times using bedtools (v2.27.1) and calculating the Jaccard coefficient. Finally, a z-score of enrichment is calculated,  $(s - \mu)/\sigma$ , where  $s$  is the Jaccard coefficient for the two sets of regions and  $\mu$  and  $\sigma$  are the mean and standard deviation of the Jaccard coefficient in the random permutation.

### Supplementary References

1. Klambauer, G. *et al.* cn.MOPS: mixture of Poissons for discovering copy number variations in next-generation sequencing data with a low false discovery rate. *Nucleic Acids Res.* **40**, e69 (2012).
2. Burger, L., Gaidatzis, D., Schübeler, D. & Stadler, M. B. Identification of active regulatory regions from DNA methylation data. *Nucleic Acids Res.* **41**, e155 (2013).
