# Supplementary material for: Glioblastoma epigenome profiling identifies SOX10 as a master regulator of molecular tumour subtype
Source: PubMed Central journal article supplement (PMC7749178; doi:10.1038/s41467-020-20225-w), 2020-12-18
Supplement: 41467_2020_20225_MOESM2_ESM.pdf [file 41467_2020_20225_MOESM2_ESM.pdf]

## Description of Additional Supplementary Files

File Name: Supplementary Data 1

Description: Patient Data

File Name: Supplementary Data 2

Description: MGMT methylation status

File Name: Supplementary Data 3

Description: WGBS QC

File Name: Supplementary Data 4

Description: RNA-seq QC

File Name: Supplementary Data 5

Description: ChIP-seq QC

File Name: Supplementary Data 6

Description: Methylation classifier probe IDs

File Name: Supplementary Data 7

Description: Master regulator lists

File Name: Supplementary Data 8

Description: RTN cohort A samplesheet

File Name: Supplementary Data 9

Description: RTN cohort B samplesheet

File Name: Supplementary Data 10

Description: Limma subtype signatures

File Name: Supplementary Data 11

Description: RTN results

File Name: Supplementary Data 12

Description: GSEA signatures

File Name: Supplementary Data 13

Description: ZH487 ATAC-seq DiffBind

File Name: Supplementary Data 14

Description: LN229 ATAC-seq DiffBind
