# Supplementary material for: Glioblastoma epigenome profiling identifies SOX10 as a master regulator of molecular tumour subtype
Source: PubMed Central journal article supplement (PMC7749178; doi:10.1038/s41467-020-20225-w), 2020-12-18
Supplement: 41467_2020_20225_MOESM17_ESM.pdf [file 41467_2020_20225_MOESM17_ESM.pdf]

## Reporting Summary

Nature Research wishes to improve the reproducibility of the work that we publish. This form provides structure for consistency and transparency in reporting. For further information on Nature Research policies, see [Authors & Referees](#) and the [Editorial Policy Checklist](#).

### Statistical parameters

When statistical analyses are reported, confirm that the following items are present in the relevant location (e.g. figure legend, table legend, main text, or Methods section).

n/a Confirmed

- The exact sample size ( $n$ ) for each experimental group/condition, given as a discrete number and unit of measurement
- An indication of whether measurements were taken from distinct samples or whether the same sample was measured repeatedly
- The statistical test(s) used AND whether they are one- or two-sided  
*Only common tests should be described solely by name; describe more complex techniques in the Methods section.*
- A description of all covariates tested
- A description of any assumptions or corrections, such as tests of normality and adjustment for multiple comparisons
- A full description of the statistics including central tendency (e.g. means) or other basic estimates (e.g. regression coefficient) AND variation (e.g. standard deviation) or associated estimates of uncertainty (e.g. confidence intervals)
- For null hypothesis testing, the test statistic (e.g.  $F$ ,  $t$ ,  $r$ ) with confidence intervals, effect sizes, degrees of freedom and  $P$  value noted  
*Give  $P$  values as exact values whenever suitable.*
- For Bayesian analysis, information on the choice of priors and Markov chain Monte Carlo settings
- For hierarchical and complex designs, identification of the appropriate level for tests and full reporting of outcomes
- Estimates of effect sizes (e.g. Cohen's  $d$ , Pearson's  $r$ ), indicating how they were calculated
- Clearly defined error bars  
*State explicitly what error bars represent (e.g. SD, SE, CI)*

*Our web collection on [statistics for biologists](#) may be useful.*

### Software and code

Policy information about [availability of computer code](#)

Data collection

No software was used for data collection.

Data analysis

The following software were used:  
 version STAR 2.3.0e  
 htseq-count 0.6.0  
 bwa-mem 0.7.8  
 BEDTools 2.27.1  
 MethylSeekR 1.14.0  
 ROSE2 <https://github.com/BradnerLab/pipeline/>;  
 bigWigAverageOverBed v2  
 GSEA v3.0;  
 OMER 4.9.1  
 featureCounts in Subread 1.5.3  
 methylCtools v. 1.0.0  
 Snakemake v. 3.13.3  
 TrimGalore v. 0.4.2 (<https://github.com/FelixKrueger/TrimGalore>)  
 deepTools2 suite v. 2.4.1 (with subsequent tools SES, bamCompare,..)

MACS2 v. 2.1.1.20160309 (<https://github.com/taoliu/MACS>)  
 BowTie2 v. 2.3.4.3  
 samtools v. 1.3.1  
 SICER v. 1.1 (Ref. 22)  
 ChromHMM v. 1.19  
 CRCmapper commit b23ad55 on [https://bitbucket.org/young\\_computation/crcmapper/](https://bitbucket.org/young_computation/crcmapper/) (Ref. 13)

R analyses were performed using v3.4.3 or 3.5.1, with the following packages: DESeq2 1.14.1, edgeR 3.20.1, limma 3.34.4, GSVA 1.26.0, ESTIMATE 1.0.13, clusterProfiler 3.6.0, bsseq 1.10.0, MethySeekR 1.14.0, cola v1.0.0, gcrma 2.50.0, sva 3.26.0, RTN 2.3.4, ggplot2 2.2.1, circize 0.4.6, ComplexHeatmap 1.19.1, EnrichedHeatmap 1.9.2, Gviz 1.22.3, epik version hash: d3898bd, minfi 1.24.0, conumee 1.3.0, monocle 2.10.1; viper 1.14.0; Rtsne 0.13; ChIPpeakAnno 3.12.4; TxDb.Hsapiens.UCSC.hg19.knownGene 3.2.2; DiffBind 2.6.6

Extensive customised analysis scripts were used in this project. These will be deposited online at the project repository: <https://github.com/dkfz-b060>

For manuscripts utilizing custom algorithms or software that are central to the research but not yet described in published literature, software must be made available to editors/reviewers upon request. We strongly encourage code deposition in a community repository (e.g. GitHub). See the Nature Research [guidelines for submitting code & software](#) for further information.

## Data

Policy information about [availability of data](#)

All manuscripts must include a [data availability statement](#). This statement should provide the following information, where applicable:

- Accession codes, unique identifiers, or web links for publicly available datasets
- A list of figures that have associated raw data
- A description of any restrictions on data availability

The processed data analysed in this study is available at the GEO (SuperSeries GSE121723 [<https://www.ncbi.nlm.nih.gov/geo/query/acc.cgi?acc=GSE121723>]). Raw sequencing data is protected and controlled access available via the EGA (accession EGAS00001003230 and EGAS00001003953). The gene expression datasets used for the RTN analysis were obtained from E-MTAB-3073 (<https://www.ebi.ac.uk/arrayexpress/experiments/E-MTAB-3073/>), and GSE4290, GSE7696, GSE16011 and GSE43378 (<https://www.ncbi.nlm.nih.gov/geo/query>). The remaining data are available within the Article, Supplementary Information or available from the authors upon request.

## Field-specific reporting

Please select the best fit for your research. If you are not sure, read the appropriate sections before making your selection.

Life sciences  Behavioural & social sciences  Ecological, evolutionary & environmental sciences

For a reference copy of the document with all sections, see [nature.com/authors/policies/ReportingSummary-flat.pdf](https://nature.com/authors/policies/ReportingSummary-flat.pdf)

## Life sciences study design

All studies must disclose on these points even when the disclosure is negative.

|                 |                                                                                                                                                                                                                                                                                                                                                                                                                                                                                                                                                                                                                                                                            |
|-----------------|----------------------------------------------------------------------------------------------------------------------------------------------------------------------------------------------------------------------------------------------------------------------------------------------------------------------------------------------------------------------------------------------------------------------------------------------------------------------------------------------------------------------------------------------------------------------------------------------------------------------------------------------------------------------------|
| Sample size     | No pre-calculation of sample size was performed before the study. As the aim of this project was to comprehensively analyse the 4 subtypes of GB, a balanced design with equal representation from each tumour subtype was chosen, subject to sample availability.                                                                                                                                                                                                                                                                                                                                                                                                         |
| Data exclusions | No data were excluded. All figures and tables were created by the authors YW, MF, TG, CH and BR.                                                                                                                                                                                                                                                                                                                                                                                                                                                                                                                                                                           |
| Replication     | All computer code was written to allow reproduction of the analysis and this was performed several times to ensure that the results remained the same. Sequencing and microarray analyses of primary tumour samples were performed once per sample. Microarray analysis for GSEA were performed 2-6 times per sample, Co-IP of BCAT1 and BRD4 was done twice, qPCR and IHC of mouse tumor samples 3-5 times, and ChIP-PCR of cell lines once. ATAC-Seq analyses were done in duplicate. The group sizes of the mouse syngraft experiments were 9 and 10 animals, and the migration/invasion data derive from analyzing 10-21 wells or cells from one biological replicate. |
| Randomization   | No randomization was performed in this study.                                                                                                                                                                                                                                                                                                                                                                                                                                                                                                                                                                                                                              |
| Blinding        | Blinding for the analysis of patient samples was not relevant to our study because the data analysis was focused on identifying differences between the subtypes, and hence class labels were required.                                                                                                                                                                                                                                                                                                                                                                                                                                                                    |

## Reporting for specific materials, systems and methods

## Materials &amp; experimental systems

| n/a                                 | Involvement                         | Involved in the study       |
|-------------------------------------|-------------------------------------|-----------------------------|
| <input checked="" type="checkbox"/> | <input type="checkbox"/>            | Unique biological materials |
| <input type="checkbox"/>            | <input checked="" type="checkbox"/> | Antibodies                  |
| <input type="checkbox"/>            | <input checked="" type="checkbox"/> | Eukaryotic cell lines       |
| <input checked="" type="checkbox"/> | <input type="checkbox"/>            | Palaeontology               |
| <input type="checkbox"/>            | <input checked="" type="checkbox"/> | Animals and other organisms |
| <input type="checkbox"/>            | <input checked="" type="checkbox"/> | Human research participants |

## Methods

| n/a                                 | Involvement                         | Involved in the study  |
|-------------------------------------|-------------------------------------|------------------------|
| <input type="checkbox"/>            | <input checked="" type="checkbox"/> | ChIP-seq               |
| <input checked="" type="checkbox"/> | <input type="checkbox"/>            | Flow cytometry         |
| <input type="checkbox"/>            | <input checked="" type="checkbox"/> | MRI-based neuroimaging |

## Antibodies

## Antibodies used

Goat anti-human SOX10 (Western blot) Santa Cruz Cat#sc-17342  
 Rabbit anti-human SOX10 (ChIP-seq, Co-IP) Abcam Cat#ab155279, lot GR113617-51  
 Rabbit polyclonal BRD4 Ab (ChIP-seq, WB and ChIP-qPCR) Bethyl Lab. Cat#A301-985A100  
 H3K27Ac (GB patient ChIP-seq) Active Motif Cat#AM#39133, lot 5  
 H3K4me1(GB patient ChIP-seq) Active Motif Cat#AM#38297, lot 1  
 H3K4me3 (GB patient ChIP-seq) Active Motif Cat#AM#39159, lot 2  
 H3K9me3 (GB patient ChIP-seq) Active Motif Cat#AM#39161, lot 3  
 H3K27me3 (GB patient ChIP-seq) Millipore Cat##07-449, lot 2382150  
 H3K36me3 (GB patient ChIP-seq) Active Motif Cat#AM#61101, lot 7  
 Rabbit polyclonal to Histone H3 (cell line ChIP-seq) Abcam Cat#ab1791  
 Rabbit polyclonal to Histone H3K4me1 (cell line ChIP-seq) Abcam Cat#ab8895  
 Rabbit polyclonal to Histone H3K4me3 (cell line ChIP-seq) Abcam Cat#ab8580  
 Rabbit polyclonal to Histone H3K9me3 (cell line ChIP-seq) Abcam Cat#ab8898  
 Rabbit polyclonal to Histone H3K27ac (cell line ChIP-seq) Abcam Cat#ab4729  
 Rabbit polyclonal to Histone H3K36me3 (cell line ChIP-seq) Abcam Cat#ab9050  
 Rabbit polyclonal to Histone H3K27me3 (cell line ChIP-seq) Abcam Cat#ab6002  
 Rabbit anti-Iba1 antibody (IHC), Wako, Cat#019-19741  
 alpha-Tubulin Sigma Cat#T-9026

## Validation

Goat anti-human SOX10 (Western blot) Santa Cruz Cat#sc-17342  
 (Santa Cruz Biotechnology Cat# sc-17342, RRID:AB\_2195374), Lot#?  
[https://antibodyregistry.org/search.php?q=AB\\_2195374](https://antibodyregistry.org/search.php?q=AB_2195374)

Rabbit anti-human SOX10 (ChIP-seq, Co-IP) Abcam Cat#ab155279, lot GR113617-51  
 (Abcam Cat# ab155279, RRID:AB\_2650603), Lot#?  
[https://antibodyregistry.org/search.php?q=AB\\_2650603](https://antibodyregistry.org/search.php?q=AB_2650603)

Rabbit polyclonal BRD4 Ab (ChIP-seq, WB and ChIP-qPCR) Bethyl Lab. Cat#A301-985A100  
 (Thermo Fisher Scientific Cat# A301-985A100, RRID:AB\_2620184), Lot#?  
[https://antibodyregistry.org/search.php?q=AB\\_2620184%3c/result%3e](https://antibodyregistry.org/search.php?q=AB_2620184%3c/result%3e)

H3K27Ac (GB patient ChIP-seq) Active Motif Cat#AM#39133, lot 5  
 (Active Motif Cat# 39133, RRID:AB\_2561016), Lot#?  
[https://antibodyregistry.org/search.php?q=AB\\_2561016](https://antibodyregistry.org/search.php?q=AB_2561016)

H3K4me1(GB patient ChIP-seq) Active Motif Cat#AM#39297, lot 1  
 (Active Motif Cat# 39297, RRID:AB\_2615075), Lot#?  
[https://antibodyregistry.org/search.php?q=AB\\_2615075](https://antibodyregistry.org/search.php?q=AB_2615075)

H3K4me3 (GB patient ChIP-seq) Active Motif Cat#AM#39159, lot 2  
 (Active Motif Cat# 39159, RRID:AB\_2615077), Lot#?  
[https://antibodyregistry.org/search.php?q=AB\\_2615077](https://antibodyregistry.org/search.php?q=AB_2615077)

H3K9me3 (GB patient ChIP-seq) Active Motif Cat#AM#39161, lot 3  
 (Active Motif Cat# 39161, RRID:AB\_2532132), Lot#?  
[https://antibodyregistry.org/search.php?q=AB\\_2532132](https://antibodyregistry.org/search.php?q=AB_2532132)

H3K27me3 (GB patient ChIP-seq) Millipore Cat##07-449, lot 2382150  
 (Millipore Cat# 07-449, RRID:AB\_310624), Lot#?  
[https://antibodyregistry.org/search.php?q=AB\\_310624](https://antibodyregistry.org/search.php?q=AB_310624)

H3K36me3 (GB patient ChIP-seq) Active Motif Cat#AM#61101, lot 7  
(Active Motif Cat# 61101, RRID:AB\_2615073), Lot#?  
[https://antibodyregistry.org/search.php?q=AB\\_2615073](https://antibodyregistry.org/search.php?q=AB_2615073)

Rabbit polyclonal to Histone H3 (cell line ChIP-seq) Abcam Cat#ab1791  
(Abcam Cat# ab1791, RRID:AB\_302613), Lot#?  
[https://antibodyregistry.org/search.php?q=AB\\_302613](https://antibodyregistry.org/search.php?q=AB_302613)

Rabbit polyclonal to Histone H3K4me1 (cell line ChIP-seq) Abcam Cat#ab8895  
(Abcam Cat# ab8895, RRID:AB\_306847), Lot#?  
[https://antibodyregistry.org/search.php?q=AB\\_306847](https://antibodyregistry.org/search.php?q=AB_306847)

Rabbit polyclonal to Histone H3K4me3 (cell line ChIP-seq) Abcam Cat#ab8580  
(Abcam Cat# ab8580, RRID:AB\_306649), Lot#?  
[https://antibodyregistry.org/search.php?q=AB\\_306649](https://antibodyregistry.org/search.php?q=AB_306649)

Rabbit polyclonal to Histone H3K9me3 (cell line ChIP-seq) Abcam Cat#ab8898  
(Abcam Cat# ab8898, RRID:AB\_306848), Lot#?  
[https://antibodyregistry.org/search.php?q=AB\\_306848](https://antibodyregistry.org/search.php?q=AB_306848)

Rabbit polyclonal to Histone H3K27ac (cell line ChIP-seq) Abcam Cat#ab4729  
(Abcam Cat# ab4729, RRID:AB\_2118291), Lot#?  
[https://antibodyregistry.org/search.php?q=AB\\_2118291](https://antibodyregistry.org/search.php?q=AB_2118291)

Rabbit polyclonal to Histone H3K36me3 (cell line ChIP-seq) Abcam Cat#ab9050  
(Abcam Cat# ab9050, RRID:AB\_306966), Lot#?  
[https://antibodyregistry.org/search.php?q=AB\\_306966](https://antibodyregistry.org/search.php?q=AB_306966)

Rabbit polyclonal to Histone H3K27me3 (cell line ChIP-seq) Abcam Cat#ab6002  
(Abcam Cat# ab6002, RRID:AB\_305237), Lot#?  
[https://antibodyregistry.org/search.php?q=AB\\_305237](https://antibodyregistry.org/search.php?q=AB_305237)

Rabbit anti-Iba1 antibody (IHC), Wako, Cat#019-19741  
(Wako Cat# 019-19741, RRID:AB\_839504), Lot#?  
[https://antibodyregistry.org/search.php?q=AB\\_839504](https://antibodyregistry.org/search.php?q=AB_839504)

alpha-Tubulin Sigma Cat#T-9026  
(Sigma-Aldrich Cat# T9026, RRID:AB\_477593), Lot#?  
[https://antibodyregistry.org/search.php?q=AB\\_477593%3c/result%3e](https://antibodyregistry.org/search.php?q=AB_477593%3c/result%3e)

Anti-mouse IgG, HRP-linked Antibody, Cell Signaling Technology #7076, 1: 5000  
(Cell Signaling Technology Cat# 7076, RRID:AB\_330924), Lot#?  
[https://antibodyregistry.org/search.php?q=AB\\_330924](https://antibodyregistry.org/search.php?q=AB_330924)

Anti-rabbit IgG, HRP-linked Antibody, Cell Signaling Technology #7074, 1:5000  
(Cell Signaling Technology Cat# 7074, RRID:AB\_2099233), Lot#?  
[https://antibodyregistry.org/search.php?q=AB\\_2099233](https://antibodyregistry.org/search.php?q=AB_2099233)

mouse anti-goat IgG-HRP, Santa Cruz sc-2354, 1:5000  
(Santa Cruz Biotechnology Cat# sc-2354, RRID:AB\_628490), Lot#?  
[https://antibodyregistry.org/search.php?q=AB\\_628490](https://antibodyregistry.org/search.php?q=AB_628490)

Goat anti-Chicken IgY (H+L) Secondary Antibody, Alexa Fluor 488, Invitrogen A-11039, 1:1000  
(Molecular Probes Cat# A-11039, RRID:AB\_142924), Lot#?  
[https://antibodyregistry.org/search.php?q=AB\\_142924](https://antibodyregistry.org/search.php?q=AB_142924)

## Eukaryotic cell lines

Policy information about [cell lines](#)

Cell line source(s)

LN229, ATCC, Cat# CRL-2611  
ZH487, GB patient-derived, Zurich University  
HEK-293T, ATCC, Cat#CRL-3216

|                                                                      |                                                                                                                                                                                             |
|----------------------------------------------------------------------|---------------------------------------------------------------------------------------------------------------------------------------------------------------------------------------------|
|                                                                      | mGB1, DKFZ, Peter Angel's lab                                                                                                                                                               |
| Authentication                                                       | Cell line identity of LN229 was confirmed by STR profiling (cell line authentication service by Multiplexion GmbH, Germany). The cell lines ZH487, HEK293T and mGB1 were not authenticated. |
| Mycoplasma contamination                                             | The cell lines LN229 and ZH487, HEK293T and mGB1 were confirmed to be mycoplasma free (test performed by Multiplexion GmbH, Germany).                                                       |
| Commonly misidentified lines<br>(See <a href="#">ICLAC</a> register) | No commonly misidentified cell line was used in this study                                                                                                                                  |

## Animals and other organisms

Policy information about [studies involving animals](#); [ARRIVE guidelines](#) recommended for reporting animal research

|                         |                                                                                                                                                                                                                                                                                                                                                                                                                                                 |
|-------------------------|-------------------------------------------------------------------------------------------------------------------------------------------------------------------------------------------------------------------------------------------------------------------------------------------------------------------------------------------------------------------------------------------------------------------------------------------------|
| Laboratory animals      | Wild type female C57-Bl6 mice were obtained from the Jackson laboratory and housed at an ambient temperature of $22.0 \pm 2.0^\circ\text{C}$ and $55.0 \pm 10.0\%$ humidity with a lights-on and lights-off times of 12 hours starting at 7 am and 7 pm, respectively. Tumor cells were injected at an age of 6 weeks (NT: n=10 and shSox10 n=9). MRI based neuroimaging was performed in the DKFZ MRI core facility on 57 days post-injection. |
| Wild animals            | No wild animals were used in the study.                                                                                                                                                                                                                                                                                                                                                                                                         |
| Field-collected samples | No field-collected samples were used in the study.                                                                                                                                                                                                                                                                                                                                                                                              |

## Human research participants

Policy information about [studies involving human research participants](#)

|                            |                                                                                                                                                                                                                                                                            |
|----------------------------|----------------------------------------------------------------------------------------------------------------------------------------------------------------------------------------------------------------------------------------------------------------------------|
| Population characteristics | The patient cohort consisted of 32 males and 28 females with an average age of $52.5 \pm 11$ years (mean and standard deviation). IDH1 mutations were present in 12 samples. All patients received standard therapy consisting of radiotherapy and Temozolamide treatment. |
| Recruitment                | Retrospective study. No recruitment.                                                                                                                                                                                                                                       |

## ChIP-seq

### Data deposition

- Confirm that both raw and final processed data have been deposited in a public database such as [GEO](#).
- Confirm that you have deposited or provided access to graph files (e.g. BED files) for the called peaks.

### Data access links

*May remain private before publication.*

GEO (processed data): see SuperSeries GSE121723, <https://www.ncbi.nlm.nih.gov/geo/query/acc.cgi?acc=GSE121723>

EGA: under study accession number EGAS00001003953

### Files in database submission

AK066\_H3K27ac\_coverage\_SES\_subtract.bigWig  
 AK066\_H3K27ac\_peaks.narrowPeak.bed  
 AK066\_H3K27ac\_W200-G600-FDR0.01-island.bed  
 AK066\_H3K27me3\_coverage\_SES\_subtract.bigWig  
 AK066\_H3K27me3\_peaks.narrowPeak.bed  
 AK066\_H3K27me3\_W200-G600-FDR0.01-island.bed  
 AK066\_H3K4me1\_coverage\_SES\_subtract.bigWig  
 AK066\_H3K4me1\_peaks.narrowPeak.bed  
 AK066\_H3K4me1\_W200-G600-FDR0.01-island.bed  
 AK066\_H3K4me3\_coverage\_SES\_subtract.bigWig  
 AK066\_H3K4me3\_peaks.narrowPeak.bed  
 AK066\_H3K4me3\_W200-G600-FDR0.01-island.bed  
 AK066\_H3K9me3\_coverage\_SES\_subtract.bigWig  
 AK066\_H3K9me3\_peaks.narrowPeak.bed  
 AK066\_H3K9me3\_W200-G600-FDR0.01-island.bed  
 AK071\_ChromHMM\_18states.bed  
 AK071\_ChromHMM\_simplified\_7states.bed  
 AK071\_H3K27ac\_coverage\_SES\_subtract.bigWig  
 AK071\_H3K27ac\_peaks.narrowPeak.bed  
 AK071\_H3K27ac\_W200-G600-FDR0.01-island.bed  
 AK071\_H3K27me3\_coverage\_SES\_subtract.bigWig  
 AK071\_H3K27me3\_peaks.narrowPeak.bed  
 AK071\_H3K27me3\_W200-G600-FDR0.01-island.bed  
 AK071\_H3K36me3\_coverage\_SES\_subtract.bigWig

AK071\_H3K36me3\_peaks.narrowPeak.bed  
AK071\_H3K36me3\_W200-G600-FDR0.01-island.bed  
AK071\_H3K4me1\_coverage\_SES\_subtract.bigWig  
AK071\_H3K4me1\_peaks.narrowPeak.bed  
AK071\_H3K4me1\_W200-G600-FDR0.01-island.bed  
AK071\_H3K4me3\_coverage\_SES\_subtract.bigWig  
AK071\_H3K4me3\_peaks.narrowPeak.bed  
AK071\_H3K4me3\_W200-G600-FDR0.01-island.bed  
AK071\_H3K9me3\_coverage\_SES\_subtract.bigWig  
AK071\_H3K9me3\_peaks.narrowPeak.bed  
AK071\_H3K9me3\_W200-G600-FDR0.01-island.bed  
AK076\_ChromHMM\_18states.bed  
AK076\_ChromHMM\_simplified\_7states.bed  
AK076\_H3K27ac\_coverage\_SES\_subtract.bigWig  
AK076\_H3K27ac\_peaks.narrowPeak.bed  
AK076\_H3K27ac\_W200-G600-FDR0.01-island.bed  
AK076\_H3K27me3\_coverage\_SES\_subtract.bigWig  
AK076\_H3K27me3\_peaks.narrowPeak.bed  
AK076\_H3K27me3\_W200-G600-FDR0.01-island.bed  
AK076\_H3K36me3\_coverage\_SES\_subtract.bigWig  
AK076\_H3K36me3\_peaks.narrowPeak.bed  
AK076\_H3K36me3\_W200-G600-FDR0.01-island.bed  
AK076\_H3K4me1\_coverage\_SES\_subtract.bigWig  
AK076\_H3K4me1\_peaks.narrowPeak.bed  
AK076\_H3K4me1\_W200-G600-FDR0.01-island.bed  
AK076\_H3K4me3\_coverage\_SES\_subtract.bigWig  
AK076\_H3K4me3\_peaks.narrowPeak.bed  
AK076\_H3K4me3\_W200-G600-FDR0.01-island.bed  
AK076\_H3K9me3\_coverage\_SES\_subtract.bigWig  
AK076\_H3K9me3\_peaks.narrowPeak.bed  
AK076\_H3K9me3\_W200-G600-FDR0.01-island.bed  
AK089\_ChromHMM\_18states.bed  
AK089\_ChromHMM\_simplified\_7states.bed  
AK089\_H3K27ac\_coverage\_SES\_subtract.bigWig  
AK089\_H3K27ac\_peaks.narrowPeak.bed  
AK089\_H3K27ac\_W200-G600-FDR0.01-island.bed  
AK089\_H3K27me3\_coverage\_SES\_subtract.bigWig  
AK089\_H3K27me3\_peaks.narrowPeak.bed  
AK089\_H3K27me3\_W200-G600-FDR0.01-island.bed  
AK089\_H3K36me3\_coverage\_SES\_subtract.bigWig  
AK089\_H3K36me3\_peaks.narrowPeak.bed  
AK089\_H3K36me3\_W200-G600-FDR0.01-island.bed  
AK089\_H3K4me1\_coverage\_SES\_subtract.bigWig  
AK089\_H3K4me1\_peaks.narrowPeak.bed  
AK089\_H3K4me1\_W200-G600-FDR0.01-island.bed  
AK089\_H3K4me3\_coverage\_SES\_subtract.bigWig  
AK089\_H3K4me3\_peaks.narrowPeak.bed  
AK089\_H3K4me3\_W200-G600-FDR0.01-island.bed  
AK089\_H3K9me3\_coverage\_SES\_subtract.bigWig  
AK089\_H3K9me3\_peaks.narrowPeak.bed  
AK089\_H3K9me3\_W200-G600-FDR0.01-island.bed  
AK091\_ChromHMM\_18states.bed  
AK091\_ChromHMM\_simplified\_7states.bed  
AK091\_H3K27ac\_coverage\_SES\_subtract.bigWig  
AK091\_H3K27ac\_peaks.narrowPeak.bed  
AK091\_H3K27ac\_W200-G600-FDR0.01-island.bed  
AK091\_H3K27me3\_coverage\_SES\_subtract.bigWig  
AK091\_H3K27me3\_peaks.narrowPeak.bed  
AK091\_H3K27me3\_W200-G600-FDR0.01-island.bed  
AK091\_H3K36me3\_coverage\_SES\_subtract.bigWig  
AK091\_H3K36me3\_peaks.narrowPeak.bed  
AK091\_H3K36me3\_W200-G600-FDR0.01-island.bed  
AK091\_H3K4me1\_coverage\_SES\_subtract.bigWig  
AK091\_H3K4me1\_peaks.narrowPeak.bed  
AK091\_H3K4me1\_W200-G600-FDR0.01-island.bed  
AK091\_H3K4me3\_coverage\_SES\_subtract.bigWig  
AK091\_H3K4me3\_peaks.narrowPeak.bed  
AK091\_H3K4me3\_W200-G600-FDR0.01-island.bed



AK091\_H3K9me3\_coverage\_SES\_subtract.bigWig  
AK091\_H3K9me3\_peaks.narrowPeak.bed  
AK091\_H3K9me3\_W200-G600-FDR0.01-island.bed  
AK100\_ChromHMM\_18states.bed  
AK100\_ChromHMM\_simplified\_7states.bed  
AK100\_H3K27ac\_coverage\_SES\_subtract.bigWig  
AK100\_H3K27ac\_peaks.narrowPeak.bed  
AK100\_H3K27ac\_W200-G600-FDR0.01-island.bed  
AK100\_H3K27me3\_coverage\_SES\_subtract.bigWig  
AK100\_H3K27me3\_peaks.narrowPeak.bed  
AK100\_H3K27me3\_W200-G600-FDR0.01-island.bed  
AK100\_H3K36me3\_coverage\_SES\_subtract.bigWig  
AK100\_H3K36me3\_peaks.narrowPeak.bed  
AK100\_H3K36me3\_W200-G600-FDR0.01-island.bed  
AK100\_H3K4me1\_coverage\_SES\_subtract.bigWig  
AK100\_H3K4me1\_peaks.narrowPeak.bed  
AK100\_H3K4me1\_W200-G600-FDR0.01-island.bed  
AK100\_H3K4me3\_coverage\_SES\_subtract.bigWig  
AK100\_H3K4me3\_peaks.narrowPeak.bed  
AK100\_H3K4me3\_W200-G600-FDR0.01-island.bed  
AK100\_H3K9me3\_coverage\_SES\_subtract.bigWig  
AK100\_H3K9me3\_peaks.narrowPeak.bed  
AK100\_H3K9me3\_W200-G600-FDR0.01-island.bed  
AK124\_ChromHMM\_18states.bed  
AK124\_ChromHMM\_simplified\_7states.bed  
AK124\_H3K27ac\_coverage\_SES\_subtract.bigWig  
AK124\_H3K27ac\_peaks.narrowPeak.bed  
AK124\_H3K27ac\_W200-G600-FDR0.01-island.bed  
AK124\_H3K27me3\_coverage\_SES\_subtract.bigWig  
AK124\_H3K27me3\_peaks.narrowPeak.bed  
AK124\_H3K27me3\_W200-G600-FDR0.01-island.bed  
AK124\_H3K36me3\_coverage\_SES\_subtract.bigWig  
AK124\_H3K36me3\_peaks.narrowPeak.bed  
AK124\_H3K36me3\_W200-G600-FDR0.01-island.bed  
AK124\_H3K4me1\_coverage\_SES\_subtract.bigWig  
AK124\_H3K4me1\_peaks.narrowPeak.bed  
AK124\_H3K4me1\_W200-G600-FDR0.01-island.bed  
AK124\_H3K4me3\_coverage\_SES\_subtract.bigWig  
AK124\_H3K4me3\_peaks.narrowPeak.bed  
AK124\_H3K4me3\_W200-G600-FDR0.01-island.bed  
AK124\_H3K9me3\_coverage\_SES\_subtract.bigWig  
AK124\_H3K9me3\_peaks.narrowPeak.bed  
AK124\_H3K9me3\_W200-G600-FDR0.01-island.bed  
AK139\_ChromHMM\_18states.bed  
AK139\_ChromHMM\_simplified\_7states.bed  
AK139\_H3K27ac\_coverage\_SES\_subtract.bigWig  
AK139\_H3K27ac\_peaks.narrowPeak.bed  
AK139\_H3K27ac\_W200-G600-FDR0.01-island.bed  
AK139\_H3K27me3\_coverage\_SES\_subtract.bigWig  
AK139\_H3K27me3\_peaks.narrowPeak.bed  
AK139\_H3K27me3\_W200-G600-FDR0.01-island.bed  
AK139\_H3K36me3\_coverage\_SES\_subtract.bigWig  
AK139\_H3K36me3\_peaks.narrowPeak.bed  
AK139\_H3K36me3\_W200-G600-FDR0.01-island.bed  
AK139\_H3K4me1\_coverage\_SES\_subtract.bigWig  
AK139\_H3K4me1\_peaks.narrowPeak.bed  
AK139\_H3K4me1\_W200-G600-FDR0.01-island.bed  
AK139\_H3K4me3\_coverage\_SES\_subtract.bigWig  
AK139\_H3K4me3\_peaks.narrowPeak.bed  
AK139\_H3K4me3\_W200-G600-FDR0.01-island.bed  
AK139\_H3K9me3\_coverage\_SES\_subtract.bigWig  
AK139\_H3K9me3\_peaks.narrowPeak.bed  
AK139\_H3K9me3\_W200-G600-FDR0.01-island.bed  
AK142\_ChromHMM\_18states.bed  
AK142\_ChromHMM\_simplified\_7states.bed  
AK142\_H3K27ac\_coverage\_SES\_subtract.bigWig  
AK142\_H3K27ac\_peaks.narrowPeak.bed  
AK142\_H3K27ac\_W200-G600-FDR0.01-island.bed

AK142\_H3K27me3\_coverage\_SES\_subtract.bigWig  
AK142\_H3K27me3\_peaks.narrowPeak.bed  
AK142\_H3K27me3\_W200-G600-FDR0.01-island.bed  
AK142\_H3K36me3\_coverage\_SES\_subtract.bigWig  
AK142\_H3K36me3\_peaks.narrowPeak.bed  
AK142\_H3K36me3\_W200-G600-FDR0.01-island.bed  
AK142\_H3K4me1\_coverage\_SES\_subtract.bigWig  
AK142\_H3K4me1\_peaks.narrowPeak.bed  
AK142\_H3K4me1\_W200-G600-FDR0.01-island.bed  
AK142\_H3K4me3\_coverage\_SES\_subtract.bigWig  
AK142\_H3K4me3\_peaks.narrowPeak.bed  
AK142\_H3K4me3\_W200-G600-FDR0.01-island.bed  
AK142\_H3K9me3\_coverage\_SES\_subtract.bigWig  
AK142\_H3K9me3\_peaks.narrowPeak.bed  
AK142\_H3K9me3\_W200-G600-FDR0.01-island.bed  
AK149\_ChromHMM\_18states.bed  
AK149\_ChromHMM\_simplified\_7states.bed  
AK149\_H3K27ac\_coverage\_SES\_subtract.bigWig  
AK149\_H3K27ac\_peaks.narrowPeak.bed  
AK149\_H3K27ac\_W200-G600-FDR0.01-island.bed  
AK149\_H3K27me3\_coverage\_SES\_subtract.bigWig  
AK149\_H3K27me3\_peaks.narrowPeak.bed  
AK149\_H3K27me3\_W200-G600-FDR0.01-island.bed  
AK149\_H3K36me3\_coverage\_SES\_subtract.bigWig  
AK149\_H3K36me3\_peaks.narrowPeak.bed  
AK149\_H3K36me3\_W200-G600-FDR0.01-island.bed  
AK149\_H3K4me1\_coverage\_SES\_subtract.bigWig  
AK149\_H3K4me1\_peaks.narrowPeak.bed  
AK149\_H3K4me1\_W200-G600-FDR0.01-island.bed  
AK149\_H3K4me3\_coverage\_SES\_subtract.bigWig  
AK149\_H3K4me3\_peaks.narrowPeak.bed  
AK149\_H3K4me3\_W200-G600-FDR0.01-island.bed  
AK149\_H3K9me3\_coverage\_SES\_subtract.bigWig  
AK149\_H3K9me3\_peaks.narrowPeak.bed  
AK149\_H3K9me3\_W200-G600-FDR0.01-island.bed  
AK153\_ChromHMM\_18states.bed  
AK153\_ChromHMM\_simplified\_7states.bed  
AK153\_H3K27ac\_coverage\_SES\_subtract.bigWig  
AK153\_H3K27ac\_peaks.narrowPeak.bed  
AK153\_H3K27ac\_W200-G600-FDR0.01-island.bed  
AK153\_H3K27me3\_coverage\_SES\_subtract.bigWig  
AK153\_H3K27me3\_peaks.narrowPeak.bed  
AK153\_H3K27me3\_W200-G600-FDR0.01-island.bed  
AK153\_H3K36me3\_coverage\_SES\_subtract.bigWig  
AK153\_H3K36me3\_peaks.narrowPeak.bed  
AK153\_H3K36me3\_W200-G600-FDR0.01-island.bed  
AK153\_H3K4me1\_coverage\_SES\_subtract.bigWig  
AK153\_H3K4me1\_peaks.narrowPeak.bed  
AK153\_H3K4me1\_W200-G600-FDR0.01-island.bed  
AK153\_H3K4me3\_coverage\_SES\_subtract.bigWig  
AK153\_H3K4me3\_peaks.narrowPeak.bed  
AK153\_H3K4me3\_W200-G600-FDR0.01-island.bed  
AK153\_H3K9me3\_coverage\_SES\_subtract.bigWig  
AK153\_H3K9me3\_peaks.narrowPeak.bed  
AK153\_H3K9me3\_W200-G600-FDR0.01-island.bed  
AK156\_ChromHMM\_18states.bed  
AK156\_ChromHMM\_simplified\_7states.bed  
AK156\_H3K27ac\_coverage\_SES\_subtract.bigWig  
AK156\_H3K27ac\_peaks.narrowPeak.bed  
AK156\_H3K27ac\_W200-G600-FDR0.01-island.bed  
AK156\_H3K27me3\_coverage\_SES\_subtract.bigWig  
AK156\_H3K27me3\_peaks.narrowPeak.bed  
AK156\_H3K27me3\_W200-G600-FDR0.01-island.bed  
AK156\_H3K36me3\_coverage\_SES\_subtract.bigWig  
AK156\_H3K36me3\_peaks.narrowPeak.bed  
AK156\_H3K36me3\_W200-G600-FDR0.01-island.bed  
AK156\_H3K4me1\_coverage\_SES\_subtract.bigWig  
AK156\_H3K4me1\_peaks.narrowPeak.bed



AK156\_H3K4me1\_W200-G600-FDR0.01-island.bed  
AK156\_H3K4me3\_coverage\_SES\_subtract.bigWig  
AK156\_H3K4me3\_peaks.narrowPeak.bed  
AK156\_H3K4me3\_W200-G600-FDR0.01-island.bed  
AK156\_H3K9me3\_coverage\_SES\_subtract.bigWig  
AK156\_H3K9me3\_peaks.narrowPeak.bed  
AK156\_H3K9me3\_W200-G600-FDR0.01-island.bed  
AK158\_ChromHMM\_18states.bed  
AK158\_ChromHMM\_simplified\_7states.bed  
AK158\_H3K27ac\_coverage\_SES\_subtract.bigWig  
AK158\_H3K27ac\_peaks.narrowPeak.bed  
AK158\_H3K27ac\_W200-G600-FDR0.01-island.bed  
AK158\_H3K27me3\_coverage\_SES\_subtract.bigWig  
AK158\_H3K27me3\_peaks.narrowPeak.bed  
AK158\_H3K27me3\_W200-G600-FDR0.01-island.bed  
AK158\_H3K36me3\_coverage\_SES\_subtract.bigWig  
AK158\_H3K36me3\_peaks.narrowPeak.bed  
AK158\_H3K36me3\_W200-G600-FDR0.01-island.bed  
AK158\_H3K4me1\_coverage\_SES\_subtract.bigWig  
AK158\_H3K4me1\_peaks.narrowPeak.bed  
AK158\_H3K4me1\_W200-G600-FDR0.01-island.bed  
AK158\_H3K4me3\_coverage\_SES\_subtract.bigWig  
AK158\_H3K4me3\_peaks.narrowPeak.bed  
AK158\_H3K4me3\_W200-G600-FDR0.01-island.bed  
AK158\_H3K9me3\_coverage\_SES\_subtract.bigWig  
AK158\_H3K9me3\_peaks.narrowPeak.bed  
AK158\_H3K9me3\_W200-G600-FDR0.01-island.bed  
AK173\_ChromHMM\_18states.bed  
AK173\_ChromHMM\_simplified\_7states.bed  
AK173\_H3K27ac\_coverage\_SES\_subtract.bigWig  
AK173\_H3K27ac\_peaks.narrowPeak.bed  
AK173\_H3K27ac\_W200-G600-FDR0.01-island.bed  
AK173\_H3K27me3\_coverage\_SES\_subtract.bigWig  
AK173\_H3K27me3\_peaks.narrowPeak.bed  
AK173\_H3K27me3\_W200-G600-FDR0.01-island.bed  
AK173\_H3K36me3\_coverage\_SES\_subtract.bigWig  
AK173\_H3K36me3\_peaks.narrowPeak.bed  
AK173\_H3K36me3\_W200-G600-FDR0.01-island.bed  
AK173\_H3K4me1\_coverage\_SES\_subtract.bigWig  
AK173\_H3K4me1\_peaks.narrowPeak.bed  
AK173\_H3K4me1\_W200-G600-FDR0.01-island.bed  
AK173\_H3K4me3\_coverage\_SES\_subtract.bigWig  
AK173\_H3K4me3\_peaks.narrowPeak.bed  
AK173\_H3K4me3\_W200-G600-FDR0.01-island.bed  
AK173\_H3K9me3\_coverage\_SES\_subtract.bigWig  
AK173\_H3K9me3\_peaks.narrowPeak.bed  
AK173\_H3K9me3\_W200-G600-FDR0.01-island.bed  
AK178\_ChromHMM\_18states.bed  
AK178\_ChromHMM\_simplified\_7states.bed  
AK178\_H3K27ac\_coverage\_SES\_subtract.bigWig  
AK178\_H3K27ac\_peaks.narrowPeak.bed  
AK178\_H3K27ac\_W200-G600-FDR0.01-island.bed  
AK178\_H3K27me3\_coverage\_SES\_subtract.bigWig  
AK178\_H3K27me3\_peaks.narrowPeak.bed  
AK178\_H3K27me3\_W200-G600-FDR0.01-island.bed  
AK178\_H3K36me3\_coverage\_SES\_subtract.bigWig  
AK178\_H3K36me3\_peaks.narrowPeak.bed  
AK178\_H3K36me3\_W200-G600-FDR0.01-island.bed  
AK178\_H3K4me1\_coverage\_SES\_subtract.bigWig  
AK178\_H3K4me1\_peaks.narrowPeak.bed  
AK178\_H3K4me1\_W200-G600-FDR0.01-island.bed  
AK178\_H3K4me3\_coverage\_SES\_subtract.bigWig  
AK178\_H3K4me3\_peaks.narrowPeak.bed  
AK178\_H3K4me3\_W200-G600-FDR0.01-island.bed  
AK178\_H3K9me3\_coverage\_SES\_subtract.bigWig  
AK178\_H3K9me3\_peaks.narrowPeak.bed  
AK178\_H3K9me3\_W200-G600-FDR0.01-island.bed  
AK183\_ChromHMM\_18states.bed

AK183\_ChromHMM\_simplified\_7states.bed  
AK183\_H3K27ac\_coverage\_SES\_subtract.bigWig  
AK183\_H3K27ac\_peaks.narrowPeak.bed  
AK183\_H3K27ac\_W200-G600-FDR0.01-island.bed  
AK183\_H3K27me3\_coverage\_SES\_subtract.bigWig  
AK183\_H3K27me3\_peaks.narrowPeak.bed  
AK183\_H3K27me3\_W200-G600-FDR0.01-island.bed  
AK183\_H3K36me3\_coverage\_SES\_subtract.bigWig  
AK183\_H3K36me3\_peaks.narrowPeak.bed  
AK183\_H3K36me3\_W200-G600-FDR0.01-island.bed  
AK183\_H3K4me1\_coverage\_SES\_subtract.bigWig  
AK183\_H3K4me1\_peaks.narrowPeak.bed  
AK183\_H3K4me1\_W200-G600-FDR0.01-island.bed  
AK183\_H3K4me3\_coverage\_SES\_subtract.bigWig  
AK183\_H3K4me3\_peaks.narrowPeak.bed  
AK183\_H3K4me3\_W200-G600-FDR0.01-island.bed  
AK183\_H3K9me3\_coverage\_SES\_subtract.bigWig  
AK183\_H3K9me3\_peaks.narrowPeak.bed  
AK183\_H3K9me3\_W200-G600-FDR0.01-island.bed  
AK199\_ChromHMM\_18states.bed  
AK199\_ChromHMM\_simplified\_7states.bed  
AK199\_H3K27ac\_coverage\_SES\_subtract.bigWig  
AK199\_H3K27ac\_peaks.narrowPeak.bed  
AK199\_H3K27ac\_W200-G600-FDR0.01-island.bed  
AK199\_H3K27me3\_coverage\_SES\_subtract.bigWig  
AK199\_H3K27me3\_peaks.narrowPeak.bed  
AK199\_H3K27me3\_W200-G600-FDR0.01-island.bed  
AK199\_H3K36me3\_coverage\_SES\_subtract.bigWig  
AK199\_H3K36me3\_peaks.narrowPeak.bed  
AK199\_H3K36me3\_W200-G600-FDR0.01-island.bed  
AK199\_H3K4me1\_coverage\_SES\_subtract.bigWig  
AK199\_H3K4me1\_peaks.narrowPeak.bed  
AK199\_H3K4me1\_W200-G600-FDR0.01-island.bed  
AK199\_H3K4me3\_coverage\_SES\_subtract.bigWig  
AK199\_H3K4me3\_peaks.narrowPeak.bed  
AK199\_H3K4me3\_W200-G600-FDR0.01-island.bed  
AK199\_H3K9me3\_coverage\_SES\_subtract.bigWig  
AK199\_H3K9me3\_peaks.narrowPeak.bed  
AK199\_H3K9me3\_W200-G600-FDR0.01-island.bed  
AK213\_ChromHMM\_18states.bed  
AK213\_ChromHMM\_simplified\_7states.bed  
AK213\_H3K27ac\_coverage\_SES\_subtract.bigWig  
AK213\_H3K27ac\_peaks.narrowPeak.bed  
AK213\_H3K27ac\_W200-G600-FDR0.01-island.bed  
AK213\_H3K27me3\_coverage\_SES\_subtract.bigWig  
AK213\_H3K27me3\_peaks.narrowPeak.bed  
AK213\_H3K27me3\_W200-G600-FDR0.01-island.bed  
AK213\_H3K36me3\_coverage\_SES\_subtract.bigWig  
AK213\_H3K36me3\_peaks.narrowPeak.bed  
AK213\_H3K36me3\_W200-G600-FDR0.01-island.bed  
AK213\_H3K4me1\_coverage\_SES\_subtract.bigWig  
AK213\_H3K4me1\_peaks.narrowPeak.bed  
AK213\_H3K4me1\_W200-G600-FDR0.01-island.bed  
AK213\_H3K4me3\_coverage\_SES\_subtract.bigWig  
AK213\_H3K4me3\_peaks.narrowPeak.bed  
AK213\_H3K4me3\_W200-G600-FDR0.01-island.bed  
AK213\_H3K9me3\_coverage\_SES\_subtract.bigWig  
AK213\_H3K9me3\_peaks.narrowPeak.bed  
AK213\_H3K9me3\_W200-G600-FDR0.01-island.bed  
AK216\_ChromHMM\_18states.bed  
AK216\_ChromHMM\_simplified\_7states.bed  
AK216\_H3K27ac\_coverage\_SES\_subtract.bigWig  
AK216\_H3K27ac\_peaks.narrowPeak.bed  
AK216\_H3K27ac\_W200-G600-FDR0.01-island.bed  
AK216\_H3K27me3\_coverage\_SES\_subtract.bigWig  
AK216\_H3K27me3\_peaks.narrowPeak.bed  
AK216\_H3K27me3\_W200-G600-FDR0.01-island.bed  
AK216\_H3K36me3\_coverage\_SES\_subtract.bigWig

AK216\_H3K36me3\_peaks.narrowPeak.bed  
 AK216\_H3K36me3\_W200-G600-FDR0.01-island.bed  
 AK216\_H3K4me1\_coverage\_SES\_subtract.bigWig  
 AK216\_H3K4me1\_peaks.narrowPeak.bed  
 AK216\_H3K4me1\_W200-G600-FDR0.01-island.bed  
 AK216\_H3K4me3\_coverage\_SES\_subtract.bigWig  
 AK216\_H3K4me3\_peaks.narrowPeak.bed  
 AK216\_H3K4me3\_W200-G600-FDR0.01-island.bed  
 AK216\_H3K9me3\_coverage\_SES\_subtract.bigWig  
 AK216\_H3K9me3\_peaks.narrowPeak.bed  
 AK216\_H3K9me3\_W200-G600-FDR0.01-island.bed  
 AK231\_ChromHMM\_18states.bed  
 AK231\_ChromHMM\_simplified\_7states.bed  
 AK231\_H3K27ac\_coverage\_SES\_subtract.bigWig  
 AK231\_H3K27ac\_peaks.narrowPeak.bed  
 AK231\_H3K27ac\_W200-G600-FDR0.01-island.bed  
 AK231\_H3K27me3\_coverage\_SES\_subtract.bigWig  
 AK231\_H3K27me3\_peaks.narrowPeak.bed  
 AK231\_H3K27me3\_W200-G600-FDR0.01-island.bed  
 AK231\_H3K36me3\_coverage\_SES\_subtract.bigWig  
 AK231\_H3K36me3\_peaks.narrowPeak.bed  
 AK231\_H3K36me3\_W200-G600-FDR0.01-island.bed  
 AK231\_H3K4me1\_coverage\_SES\_subtract.bigWig  
 AK231\_H3K4me1\_peaks.narrowPeak.bed  
 AK231\_H3K4me1\_W200-G600-FDR0.01-island.bed  
 AK231\_H3K4me3\_coverage\_SES\_subtract.bigWig  
 AK231\_H3K4me3\_peaks.narrowPeak.bed  
 AK231\_H3K4me3\_W200-G600-FDR0.01-island.bed  
 AK231\_H3K9me3\_coverage\_SES\_subtract.bigWig  
 AK231\_H3K9me3\_peaks.narrowPeak.bed  
 AK231\_H3K9me3\_W200-G600-FDR0.01-island.bed  
 GB\_H3K27ac\_superenhancers\_IDH\_specific\_FDR\_0.1\_log2FC\_1.bed  
 GB\_H3K27ac\_superenhancers\_matrix\_with\_target\_gene\_predictions.csv  
 GB\_H3K27ac\_superenhancers\_MES\_specific\_FDR\_0.1\_log2FC\_1.bed  
 GB\_H3K27ac\_superenhancers\_RTK\_I\_specific\_FDR\_0.1\_log2FC\_1.bed  
 GB\_H3K27ac\_superenhancers\_RTK\_II\_specific\_FDR\_0.1\_log2FC\_1.bed  
 GB\_H3K27ac\_superenhancers.bed  
 IDH\_ChromHMM\_18states.bed  
 IDH\_ChromHMM\_simplified\_7states.bed  
 IDH\_subtype\_H3K27ac\_superenhancers.bed  
 MES\_ChromHMM\_18states.bed  
 MES\_ChromHMM\_simplified\_7states.bed  
 MES\_subtype\_H3K27ac\_superenhancers.bed  
 NBr\_ChromHMM\_18states.bed  
 NBr\_ChromHMM\_simplified\_7states.bed  
 RTK\_I\_ChromHMM\_18states.bed  
 RTK\_I\_ChromHMM\_simplified\_7states.bed  
 RTK\_I\_subtype\_H3K27ac\_superenhancers.bed  
 RTK\_II\_ChromHMM\_18states.bed  
 RTK\_II\_ChromHMM\_simplified\_7states.bed  
 RTK\_II\_subtype\_H3K27ac\_superenhancers.bed  
 LN229\_shControl\_ChromHMM\_18states.bed  
 LN229\_shControl\_ChromHMM\_simplified\_7states.bed  
 LN229\_shControl\_H3\_coverage\_SES\_subtract.bigWig  
 LN229\_shControl\_H3K27ac\_coverage\_SES\_subtract.bigWig  
 LN229\_shControl\_H3K27ac\_peaks.narrowPeak.bed  
 LN229\_shControl\_H3K27ac\_W200-G600-FDR0.01-island.bed  
 LN229\_shControl\_H3K27me3\_coverage\_SES\_subtract.bigWig  
 LN229\_shControl\_H3K27me3\_peaks.narrowPeak.bed  
 LN229\_shControl\_H3K27me3\_W200-G600-FDR0.01-island.bed  
 LN229\_shControl\_H3K36me3\_coverage\_SES\_subtract.bigWig  
 LN229\_shControl\_H3K36me3\_peaks.narrowPeak.bed  
 LN229\_shControl\_H3K36me3\_W200-G600-FDR0.01-island.bed  
 LN229\_shControl\_H3K4me1\_coverage\_SES\_subtract.bigWig  
 LN229\_shControl\_H3K4me1\_peaks.narrowPeak.bed  
 LN229\_shControl\_H3K4me1\_W200-G600-FDR0.01-island.bed  
 LN229\_shControl\_H3K4me3\_coverage\_SES\_subtract.bigWig  
 LN229\_shControl\_H3K4me3\_peaks.narrowPeak.bed

LN229\_shControl\_H3K4me3\_W200-G600-FDR0.01-island.bed  
 LN229\_shControl\_H3K9me3\_coverage\_SES\_subtract.bigWig  
 LN229\_shControl\_H3K9me3\_peaks.narrowPeak.bed  
 LN229\_shControl\_H3K9me3\_W200-G600-FDR0.01-island.bed  
 LN229\_shSOX10\_ChromHMM\_18states.bed  
 LN229\_shSOX10\_ChromHMM\_simplified\_7states.bed  
 LN229\_shSOX10\_H3\_coverage\_SES\_subtract.bigWig  
 LN229\_shSOX10\_H3K27ac\_coverage\_SES\_subtract.bigWig  
 LN229\_shSOX10\_H3K27ac\_peaks.narrowPeak.bed  
 LN229\_shSOX10\_H3K27ac\_W200-G600-FDR0.01-island.bed  
 LN229\_shSOX10\_H3K27me3\_coverage\_SES\_subtract.bigWig  
 LN229\_shSOX10\_H3K27me3\_peaks.narrowPeak.bed  
 LN229\_shSOX10\_H3K27me3\_W200-G600-FDR0.01-island.bed  
 LN229\_shSOX10\_H3K36me3\_coverage\_SES\_subtract.bigWig  
 LN229\_shSOX10\_H3K36me3\_peaks.narrowPeak.bed  
 LN229\_shSOX10\_H3K36me3\_W200-G600-FDR0.01-island.bed  
 LN229\_shSOX10\_H3K4me1\_coverage\_SES\_subtract.bigWig  
 LN229\_shSOX10\_H3K4me1\_peaks.narrowPeak.bed  
 LN229\_shSOX10\_H3K4me1\_W200-G600-FDR0.01-island.bed  
 LN229\_shSOX10\_H3K4me3\_coverage\_SES\_subtract.bigWig  
 LN229\_shSOX10\_H3K4me3\_peaks.narrowPeak.bed  
 LN229\_shSOX10\_H3K4me3\_W200-G600-FDR0.01-island.bed  
 LN229\_shSOX10\_H3K9me3\_coverage\_SES\_subtract.bigWig  
 LN229\_shSOX10\_H3K9me3\_peaks.narrowPeak.bed  
 LN229\_shControl\_BRD4\_coverage\_SES\_subtract.bw  
 LN229\_shControl\_BRD4\_peaks\_narrowPeaks.bed  
 LN229\_shControl\_SOX10\_coverage\_SES\_subtract.bw  
 LN229\_shControl\_SOX10\_peaks\_narrowPeaks.bed  
 LN229\_shSOX10\_BRD4\_coverage\_SES\_subtract.bw  
 LN229\_shSOX10\_BRD4\_peaks\_narrowPeaks.bed  
 ZH487\_shControl\_BRD4\_coverage\_SES\_subtract.bw  
 ZH487\_shControl\_BRD4\_peaks\_narrowPeaks.bed  
 ZH487\_shControl\_RNAseq\_coverage.bigWig  
 ZH487\_shControl\_SOX10\_coverage\_SES\_subtract.bw  
 ZH487\_shControl\_SOX10\_peaks\_narrowPeaks.bed  
 ZH487\_shSOX10\_BRD4\_coverage\_SES\_subtract.bw  
 ZH487\_shSOX10\_BRD4\_peaks\_narrowPeaks.bed  
 ZH487\_shSOX10\_RNAseq\_coverage.bigWig

Genome browser session  
 (e.g. [UCSC](#))

No longer applicable.

## Methodology

Replicates

A single replicate was performed for tumors and cell lines

Sequencing depth

All ChIP-seq sequencing was done as single-end sequencing with read length of 50bp.

Sample Condition Mark Uniquely mapped reads MACS2 narrow peaks (FDR=1%) MACS2 broad peaks (FDR=1%) MCS2 FRiP SICER FRiP NSC RSC

LN229 Ctrl H3 24512489 1.026785 1.73064  
 LN229 shSOX10 H3 21811954 1.025389 1.348918  
 ZH487 Ctrl H3 20613046 1.028871 1.404383  
 ZH487 shSOX10 H3 23258864 1.02604 1.604519

LN229 Ctrl H3K27ac 25430164 9272 8560 0.0150215 0.0892369 1.033626 2.248043  
 LN229 shSOX10 H3K27ac 23022472 21095 17743 0.0410475 0.14945 1.042754 1.991535  
 ZH487 Ctrl H3K27ac 17715461 4725 5860 0.00725722 0.0681532 1.04017 2.111029  
 ZH487 shSOX10 H3K27ac 20787805 698 1105 0.000828851 0.0379295 1.03143 2.165912

LN229 Ctrl H3K27me3 22816947 8019 6493 0.0144241 0.105062 1.034034 2.204209  
 LN229 shSOX10 H3K27me3 21192391 14961 8149 0.0338666 0.156842 1.038613 2.220496  
 ZH487 Ctrl H3K27me3 21346470 653 1663 0.000719135 0.13586 1.037528 1.74075  
 ZH487 shSOX10 H3K27me3 22259161 26830 19990 0.046341 0.266631 1.046331 2.322192

LN229 Ctrl H3K36me3 24206405 86826 40431 0.144512 0.392729 1.055404 2.248104  
 LN229 shSOX10 H3K36me3 24312662 92041 40935 0.181047 0.448887 1.062624 2.190289  
 ZH487 Ctrl H3K36me3 21845653 43863 38850 0.0593123 0.375396 1.055985 2.097624  
 ZH487 shSOX10 H3K36me3 22971151 44653 37864 0.0572665 0.324928 1.048436 2.140586

LN229 Ctrl H3K4me1 24958627 15978 19713 0.0211765 0.254768 1.043374 2.756624  
 LN229 shSOX10 H3K4me1 21793848 54237 42658 0.0881653 0.338592 1.053911 2.632628  
 ZH487 Ctrl H3K4me1 21062645 941 3606 0.00100885 0.195677 1.045271 2.547238  
 ZH487 shSOX10 H3K4me1 22429057 6585 14849 0.00664709 0.227243 1.042233 2.779748

LN229 Ctrl H3K4me3 22857403 23614 14550 0.118403 0.168187 1.085103 2.826811  
 LN229 shSOX10 H3K4me3 23287389 22172 15527 0.19743 0.244145 1.182384 2.400035  
 ZH487 Ctrl H3K4me3 21740562 19293 13887 0.1466 0.196481 1.139643 2.5651  
 ZH487 shSOX10 H3K4me3 32327920 20536 13579 0.119495 0.184294 1.094075 2.74555

LN229 Ctrl H3K9me3 23381932 8470 22802 0.0121544 0.345482 1.042052 1.182686  
 LN229 shSOX10 H3K9me3 21221052 14946 32451 0.0201362 0.390599 1.046882 1.107382  
 ZH487 Ctrl H3K9me3 20192760 167 360 0.000663852 0.145437 1.043036 1.029732  
 ZH487 shSOX10 H3K9me3 19518520 67 185 0.000354023 0.118737 1.036588 1.015953

Sample Mark Uniquely Aligned Reads MACS2 narrow peaks MACS2 broad peaks SICER peaks Macs2\_FRIP SICER\_FRIP NSC  
 RSC

AK066 H3K27ac 12533680 38000 28090 40909 0.407 0.531 1.347 1.571  
 AK071 H3K27ac 31566410 44288 35078 46710 0.482 0.599 1.665 1.619  
 AK076 H3K27ac 20428917 48594 37982 45984 0.556 0.669 1.578 1.853  
 AK089 H3K27ac 27095860 40578 32594 47952 0.558 0.680 1.816 1.687  
 AK091 H3K27ac 24359133 40493 31357 49861 0.436 0.568 1.521 1.485  
 AK100 H3K27ac 26707287 40542 32798 46235 0.682 0.768 1.955 1.885  
 AK124 H3K27ac 27764449 39364 31797 45320 0.536 0.663 1.797 1.787  
 AK139 H3K27ac 28265580 19765 15999 39586 0.147 0.326 1.252 1.535  
 AK142 H3K27ac 31340856 36567 29042 38196 0.579 0.680 1.574 1.617  
 AK149 H3K27ac 7614120 48120 37639 35223 0.405 0.482 1.543 1.527  
 AK153 H3K27ac 33683525 48082 34377 53360 0.520 0.674 1.474 1.439  
 AK156 H3K27ac 32184220 35434 27269 39819 0.498 0.640 1.849 1.456  
 AK158 H3K27ac 37042079 41262 32147 45102 0.593 0.731 1.875 1.624  
 AK173 H3K27ac 24716555 45564 33270 51630 0.452 0.616 1.412 1.702  
 AK178 H3K27ac 35831618 38317 31033 48030 0.616 0.738 1.820 1.628  
 AK183 H3K27ac 35115386 47184 36391 57016 0.440 0.579 1.699 1.638  
 AK199 H3K27ac 29759682 40866 32986 46545 0.539 0.654 1.836 1.736  
 AK213 H3K27ac 23868584 39008 29831 45767 0.417 0.562 1.544 1.683  
 AK216 H3K27ac 30120840 38207 28945 44340 0.431 0.579 1.438 1.494  
 AK231 H3K27ac 33242415 53554 39486 52080 0.527 0.684 1.675 1.716

AK066 H3K27me3 29575965 3005 2270 50625 0.021 0.290 1.039 1.042  
 AK071 H3K27me3 24947338 295 503 39300 0.004 0.189 1.043 1.162  
 AK076 H3K27me3 41336476 2922 2900 45002 0.019 0.269 1.038 0.963  
 AK089 H3K27me3 45939938 10297 8229 44819 0.067 0.379 1.039 0.826  
 AK091 H3K27me3 37913736 1530 2028 43735 0.010 0.221 1.029 0.700  
 AK100 H3K27me3 23923310 8835 6535 39517 0.083 0.405 1.061 0.974  
 AK124 H3K27me3 19971600 8874 5900 39605 0.056 0.276 1.039 0.854  
 AK139 H3K27me3 25742116 5916 4462 27214 0.035 0.209 1.032 0.819  
 AK142 H3K27me3 24714525 10529 8062 36044 0.067 0.340 1.045 0.711  
 AK149 H3K27me3 19003438 2805 2970 43359 0.017 0.211 1.026 0.699  
 AK153 H3K27me3 18114281 2784 2806 41373 0.018 0.199 1.034 0.841  
 AK156 H3K27me3 18132032 9787 7396 45217 0.068 0.302 1.039 0.999  
 AK158 H3K27me3 19007955 14003 9376 45075 0.122 0.416 1.058 0.973  
 AK173 H3K27me3 60208456 15722 10412 46940 0.096 0.412 1.033 0.833  
 AK178 H3K27me3 42110480 3240 2961 46686 0.028 0.338 1.043 0.926  
 AK183 H3K27me3 41936266 12769 9433 43628 0.079 0.326 1.038 0.858  
 AK199 H3K27me3 19389899 16227 11294 48983 0.107 0.391 1.053 0.857  
 AK213 H3K27me3 23745292 2908 2994 40435 0.019 0.317 1.034 0.809  
 AK216 H3K27me3 23792298 3767 3998 42953 0.024 0.319 1.030 0.839  
 AK231 H3K27me3 18267008 4674 3842 31666 0.030 0.276 1.046 0.995

AK066 H3K4me1 12917037 19154 16916 53699 0.128 0.407 1.062 1.078  
 AK071 H3K4me1 30165521 35066 26172 67688 0.214 0.552 1.080 1.098  
 AK076 H3K4me1 11655339 40382 33790 61828 0.234 0.483 1.078 1.077  
 AK089 H3K4me1 28438485 34638 26382 56422 0.234 0.554 1.072 1.280  
 AK091 H3K4me1 19211822 23903 20696 69101 0.137 0.449 1.054 0.977  
 AK100 H3K4me1 25640515 41608 28623 54073 0.330 0.616 1.120 1.165  
 AK124 H3K4me1 28495618 46391 28027 58715 0.371 0.661 1.087 1.158  
 AK139 H3K4me1 20703745 20596 18269 70086 0.119 0.466 1.047 0.962



AK142 H3K4me1 31736727 54205 33209 58503 0.390 0.680 1.111 1.082  
 AK149 H3K4me1 5350305 29496 27701 42727 0.178 0.338 1.062 0.966  
 AK153 H3K4me1 26863770 34664 24864 72563 0.219 0.592 1.057 0.943  
 AK156 H3K4me1 12989333 44222 30258 54847 0.339 0.596 1.094 1.109  
 AK158 H3K4me1 17803207 39563 25868 45615 0.342 0.657 1.089 1.111  
 AK173 H3K4me1 16853351 38882 26852 48870 0.242 0.552 1.067 1.080  
 AK178 H3K4me1 22748540 36741 25084 57037 0.308 0.640 1.091 1.108  
 AK183 H3K4me1 35025985 26197 18458 60484 0.163 0.585 1.063 1.048  
 AK199 H3K4me1 29202519 35992 25668 64989 0.263 0.581 1.100 1.107  
 AK213 H3K4me1 18988518 25462 20507 63268 0.149 0.461 1.054 1.058  
 AK216 H3K4me1 22456040 32130 26676 66185 0.182 0.500 1.067 1.097  
 AK231 H3K4me1 11348604 46354 33827 59121 0.281 0.539 1.064 1.053

AK066 H3K4me3 37403467 20747 16190 25035 0.448 0.544 1.866 1.297  
 AK071 H3K4me3 24802407 24871 19966 26334 0.521 0.570 2.384 1.551  
 AK076 H3K4me3 48896166 25816 22270 28818 0.623 0.674 2.405 1.482  
 AK089 H3K4me3 64737234 26297 20237 29402 0.618 0.701 1.864 1.297  
 AK091 H3K4me3 49980796 27174 20669 28146 0.476 0.564 1.635 1.248  
 AK100 H3K4me3 36028796 27225 19461 28123 0.681 0.745 2.052 1.384  
 AK124 H3K4me3 29510615 27255 20575 25676 0.666 0.743 2.238 1.439  
 AK139 H3K4me3 36232299 27841 20025 29778 0.496 0.591 1.681 1.293  
 AK142 H3K4me3 38017190 25732 17545 23331 0.666 0.714 2.015 1.289  
 AK149 H3K4me3 25093560 24424 18497 24396 0.468 0.543 1.815 1.297  
 AK153 H3K4me3 30277101 27391 19235 28415 0.548 0.635 1.746 1.286  
 AK156 H3K4me3 23072061 24076 18983 25715 0.619 0.689 2.129 1.420  
 AK158 H3K4me3 26830381 23579 18089 24054 0.628 0.691 2.310 1.441  
 AK173 H3K4me3 57509726 27065 19449 23716 0.588 0.664 2.036 1.465  
 AK178 H3K4me3 40133654 26559 19759 30244 0.632 0.718 1.949 1.470  
 AK183 H3K4me3 52077962 25769 19032 24122 0.587 0.661 2.010 1.397  
 AK199 H3K4me3 35329114 24508 18011 24892 0.635 0.694 2.201 1.315  
 AK213 H3K4me3 38693955 26266 20038 27222 0.521 0.610 1.862 1.339  
 AK216 H3K4me3 26154448 25268 19618 25837 0.568 0.645 1.971 1.262  
 AK231 H3K4me3 28285601 26217 20555 25673 0.679 0.744 2.169 1.473

AK066 H3K9me3 16136468 1132 1059 29023 0.017 0.178 1.033 0.349  
 AK071 H3K9me3 17105556 3488 3388 32311 0.047 0.226 1.046 0.317  
 AK076 H3K9me3 38482722 3436 3740 34599 0.038 0.264 1.050 0.469  
 AK089 H3K9me3 43903910 2402 2392 49004 0.031 0.255 1.044 0.428  
 AK091 H3K9me3 51096666 1234 953 33583 0.021 0.191 1.036 0.431  
 AK100 H3K9me3 19031385 5493 4851 54573 0.060 0.302 1.068 0.461  
 AK124 H3K9me3 6316418 5554 7725 24817 0.037 0.143 1.059 0.307  
 AK139 H3K9me3 24241086 469 420 36194 0.008 0.163 1.042 0.651  
 AK142 H3K9me3 15535198 9928 9999 46935 0.068 0.336 1.072 0.545  
 AK149 H3K9me3 21808504 432 496 23428 0.007 0.096 1.031 0.465  
 AK153 H3K9me3 6732220 8860 10452 26575 0.071 0.199 1.058 0.194  
 AK156 H3K9me3 24139665 2349 2331 51177 0.023 0.322 1.039 0.484  
 AK158 H3K9me3 27618268 3305 3129 66787 0.035 0.367 1.054 0.574  
 AK173 H3K9me3 37066656 2029 1976 46989 0.023 0.204 1.044 0.438  
 AK178 H3K9me3 37453998 3220 3089 59019 0.038 0.296 1.067 0.526  
 AK183 H3K9me3 67181242 2026 1839 51428 0.024 0.285 1.037 0.501  
 AK199 H3K9me3 22437174 8679 7924 55088 0.060 0.362 1.056 0.549  
 AK213 H3K9me3 31005153 929 910 58555 0.012 0.247 1.042 0.660  
 AK216 H3K9me3 19994983 1790 1471 41876 0.029 0.192 1.041 0.362  
 AK231 H3K9me3 28738910 2482 2587 64086 0.023 0.276 1.050 0.645

AK066 H3K36me3 NA NA NA NA NA NA NA NA  
 AK071 H3K36me3 22574974 34338 21453 42190 0.204 0.515 1.071 0.984  
 AK076 H3K36me3 51164902 53209 28760 39039 0.443 0.679 1.114 1.072  
 AK089 H3K36me3 32431850 38116 22217 33571 0.260 0.536 1.053 0.827  
 AK091 H3K36me3 51281494 28312 18670 42173 0.172 0.491 1.058 1.013  
 AK100 H3K36me3 24934005 38830 20601 35648 0.335 0.607 1.092 0.916  
 AK124 H3K36me3 22002376 38282 20924 38160 0.266 0.551 1.077 0.945  
 AK139 H3K36me3 24782944 30642 20167 44438 0.201 0.476 1.074 1.139  
 AK142 H3K36me3 27813661 48539 25045 32969 0.349 0.628 1.092 1.022  
 AK149 H3K36me3 30892255 29682 18855 43832 0.174 0.501 1.054 0.909  
 AK153 H3K36me3 20590823 39688 24153 45462 0.246 0.536 1.072 1.012  
 AK156 H3K36me3 25193562 27329 16780 39023 0.186 0.537 1.060 0.988  
 AK158 H3K36me3 26400055 37337 19695 33668 0.319 0.650 1.072 0.900



|                         |                                                                                                                                                                                                                                                                                                                                                                                                                                                                                                                                                                                     |
|-------------------------|-------------------------------------------------------------------------------------------------------------------------------------------------------------------------------------------------------------------------------------------------------------------------------------------------------------------------------------------------------------------------------------------------------------------------------------------------------------------------------------------------------------------------------------------------------------------------------------|
|                         | AK173 H3K36me3 54683540 41922 23202 36145 0.282 0.582 1.059 0.929<br>AK178 H3K36me3 45599734 31728 17886 39160 0.273 0.599 1.078 0.995<br>AK183 H3K36me3 51098620 29280 19671 35698 0.167 0.524 1.050 0.837<br>AK199 H3K36me3 19575484 36097 21908 44137 0.235 0.501 1.062 0.829<br>AK213 H3K36me3 28469409 20325 13254 47297 0.119 0.413 1.048 0.937<br>AK216 H3K36me3 29512243 41459 23775 52168 0.269 0.552 1.089 1.189<br>AK231 H3K36me3 14150415 57696 31117 36494 0.397 0.616 1.090 0.954                                                                                     |
| Antibodies              | For tumour ChIPseq experiments; antibodies are from Active Motif unless otherwise specified: H3K27Ac (AM#39133, lot 5), H3K4me1 (AM#38297, lot 1), H3K4me3 (AM#39159, lot 2), H3K9me3 (AM#39161, lot 3), H3K27me3 (#07-449, lot 2382150, Millipore) and H3K36me3 (AM#61101, lot 7).<br><br>For cell line experiments: H3, ab1791; H3K4me1, ab8895; H3K4me3, ab8580; H3K9me3, ab8898; H3K27ac, ab4729; H3K36me3, ab9050; H3K27me3, ab6002; all Abcam. In addition, antibodies of BRD4 (Bethyl Lab., Cat#A301-985A100) and SOX10 (Abcam, Cat#ab155279) were also used for TF-ChIPseq. |
| Peak calling parameters | MACS2 narrow peaks: macs2 callpeak -t {input.ip} -c {input.control} -g hs --outdir {params.outdir} -n {params.name} -q 0.01 --SPMR<br>MACS2 broad peaks : macs2 callpeak -t {input.ip} -c {input.control} -g hs --outdir {params.outdir} -n {params.name} --broad --broad-cutoff 0.01<br>SICER peaks: SICER.sh {params.outdir} \$IPBED \$CONTROLBED {params.outdir} hg19 1 200 150 0.7 600 0.01                                                                                                                                                                                     |
| Data quality            | Methods for QC determination in ChIP-seq experiments were comparable to those used by the ENCODE consortium<br>1. fraction of reads in peaks (FRiP) determined both using MACS2 narrow peaks and SICER peaks<br>2. normalized and relative strand correlation (NSC / RSC)<br>3. Number of peaks / aligned reads<br>4. visual inspection of bigwig tracks<br><br>See table above for all QC parameters                                                                                                                                                                               |
| Software                | The ChIP-seq analysis pipeline was implemented in Snakemake v 3.13.3; it is available under <a href="https://github.com/dkfz-b060">https://github.com/dkfz-b060</a>                                                                                                                                                                                                                                                                                                                                                                                                                 |

## Magnetic resonance imaging

### Experimental design

|                                 |                                                      |
|---------------------------------|------------------------------------------------------|
| Design type                     | MRI was performed in resting state under anesthesia. |
| Design specifications           | Not applicable                                       |
| Behavioral performance measures | Not applicable                                       |

### Acquisition

|                               |                                                                                                                                                                                           |
|-------------------------------|-------------------------------------------------------------------------------------------------------------------------------------------------------------------------------------------|
| Imaging type(s)               | Structural, perfusion                                                                                                                                                                     |
| Field strength                | 1 Tesla                                                                                                                                                                                   |
| Sequence & imaging parameters | <i>Specify the pulse sequence type (gradient echo, spin echo, etc.), imaging type (EPI, spiral, etc.), field of view, matrix size, slice thickness, orientation and TE/TR/flip angle.</i> |
| Area of acquisition           | Whole brain                                                                                                                                                                               |
| Diffusion MRI                 | <input type="checkbox"/> Used <input checked="" type="checkbox"/> Not used                                                                                                                |

### Preprocessing

|                            |                                                                                                                                                                                                                                                |
|----------------------------|------------------------------------------------------------------------------------------------------------------------------------------------------------------------------------------------------------------------------------------------|
| Preprocessing software     | <i>Provide detail on software version and revision number and on specific parameters (model/functions, brain extraction, segmentation, smoothing kernel size, etc.).</i>                                                                       |
| Normalization              | <i>If data were normalized/standardized, describe the approach(es): specify linear or non-linear and define image types used for transformation OR indicate that data were not normalized and explain rationale for lack of normalization.</i> |
| Normalization template     | <i>Describe the template used for normalization/transformation, specifying subject space or group standardized space (e.g. original Talairach, MNI305, ICBM152) OR indicate that the data were not normalized.</i>                             |
| Noise and artifact removal | <i>Describe your procedure(s) for artifact and structured noise removal, specifying motion parameters, tissue signals and physiological signals (heart rate, respiration).</i>                                                                 |
| Volume censoring           | <i>Define your software and/or method and criteria for volume censoring, and state the extent of such censoring.</i>                                                                                                                           |

## Statistical modeling &amp; inference

Model type and settings

Specify type (mass univariate, multivariate, RSA, predictive, etc.) and describe essential details of the model at the first and second levels (e.g. fixed, random or mixed effects; drift or auto-correlation).

Effect(s) tested

Define precise effect in terms of the task or stimulus conditions instead of psychological concepts and indicate whether ANOVA or factorial designs were used.

Specify type of analysis:  Whole brain  ROI-based  BothStatistic type for inference  
(See [Eklund et al. 2016](#))

Specify voxel-wise or cluster-wise and report all relevant parameters for cluster-wise methods.

Correction

Describe the type of correction and how it is obtained for multiple comparisons (e.g. FWE, FDR, permutation or Monte Carlo).

## Models &amp; analysis

n/a | Involved in the study

  Functional and/or effective connectivity  Graph analysis  Multivariate modeling or predictive analysis

Functional and/or effective connectivity

Report the measures of dependence used and the model details (e.g. Pearson correlation, partial correlation, mutual information).

Graph analysis

Report the dependent variable and connectivity measure, specifying weighted graph or binarized graph, subject- or group-level, and the global and/or node summaries used (e.g. clustering coefficient, efficiency, etc.).

Multivariate modeling and predictive analysis

Specify independent variables, features extraction and dimension reduction, model, training and evaluation metrics.
